# Supplementary material for: Seed Rain and Seedling Establishment of <em>Picea glauca</em> and <em>Abies balsamea</em> after Partial Cutting in Plantations and Natural Stands
Source: Preprints.org preprint supplement (doi:10.20944/preprints201808.0515.v1), 2018-08-30
Supplement: Supplementary file 1 [file Back matter.docx]

Supplementary material Fig. S1 A-B

**A**


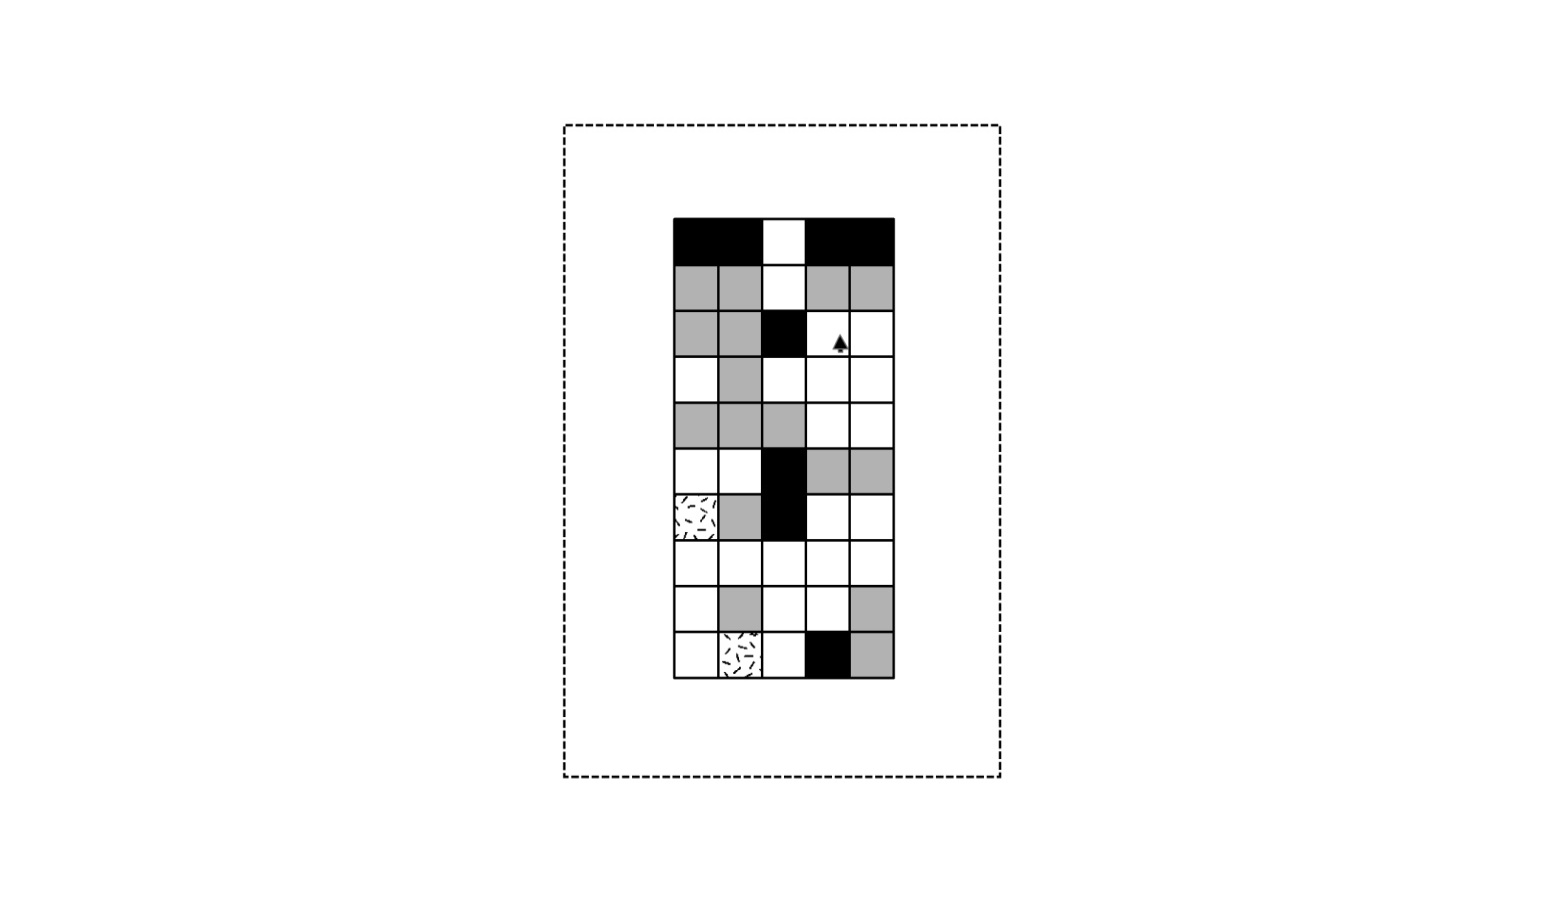

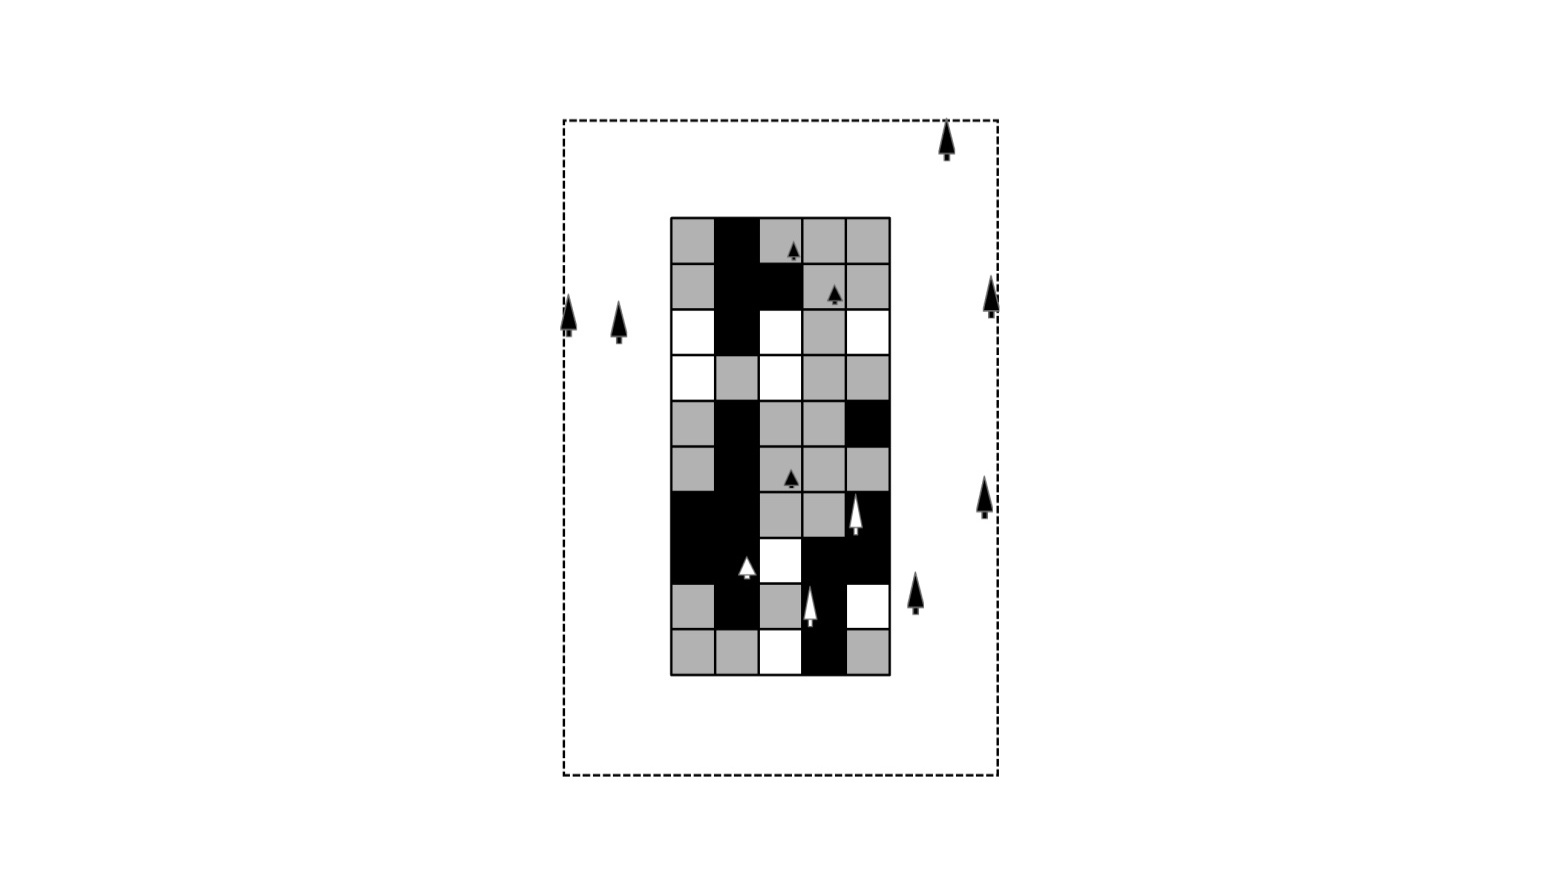

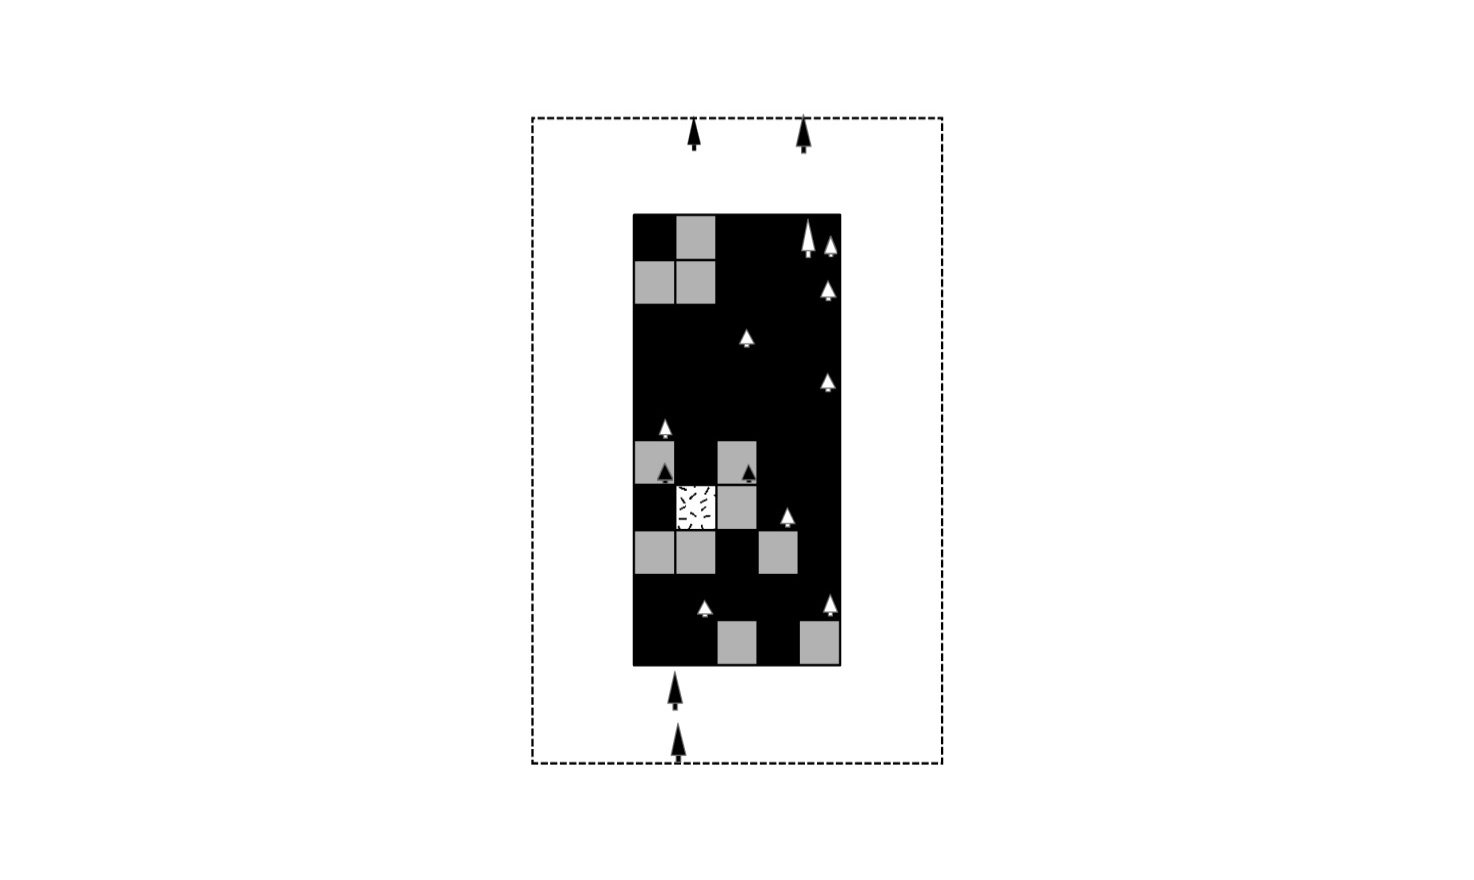

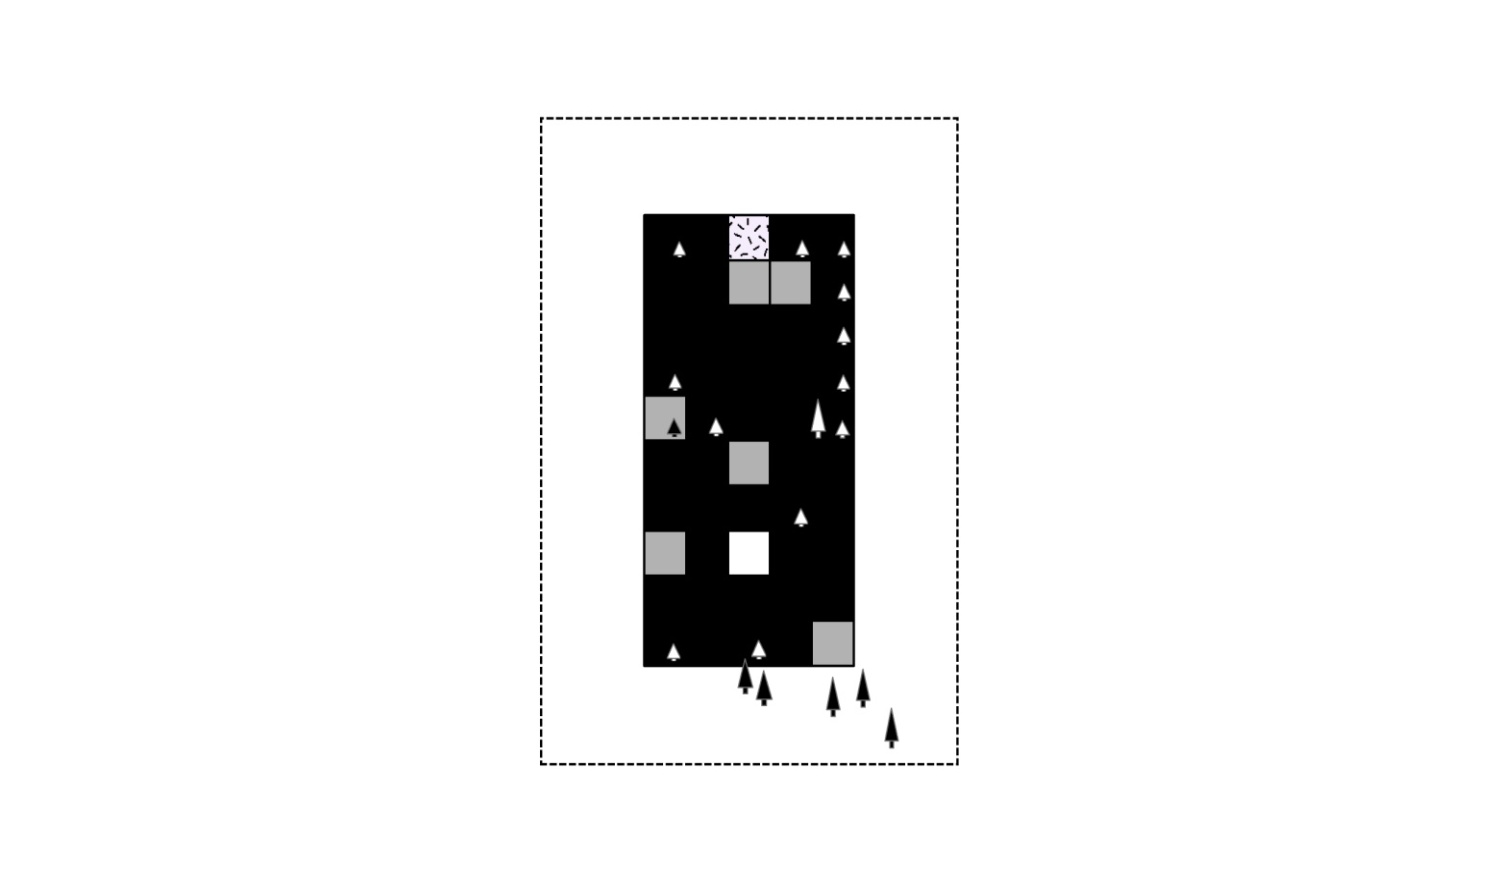


Site 3(a) 51-71 years old

Site 2(b) 52-65 years old

Site 2(a) 52-65 years old

Site 1 37-40 years old


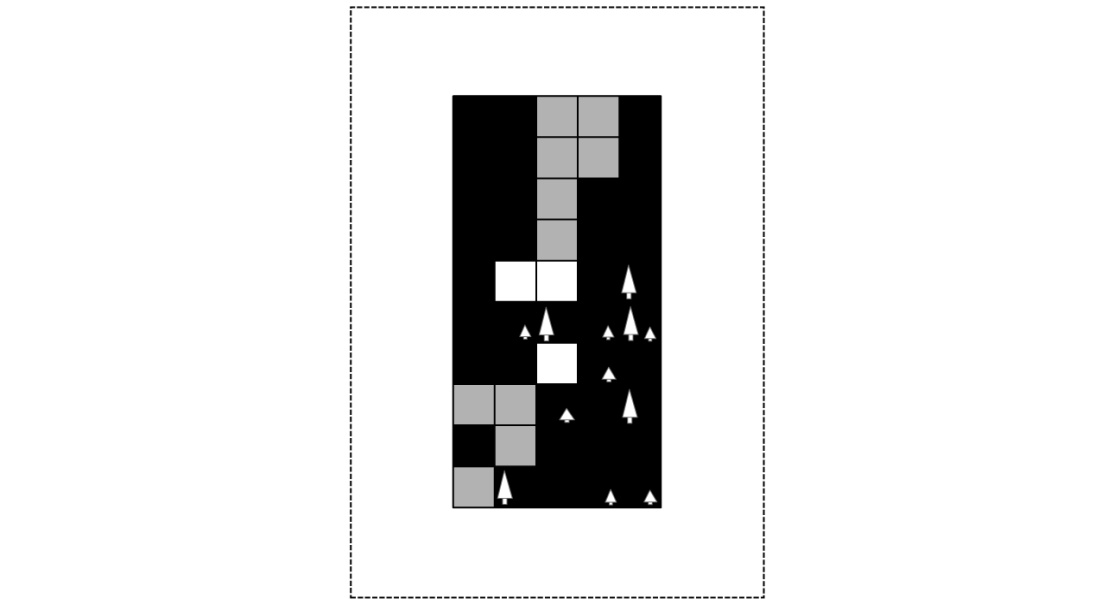

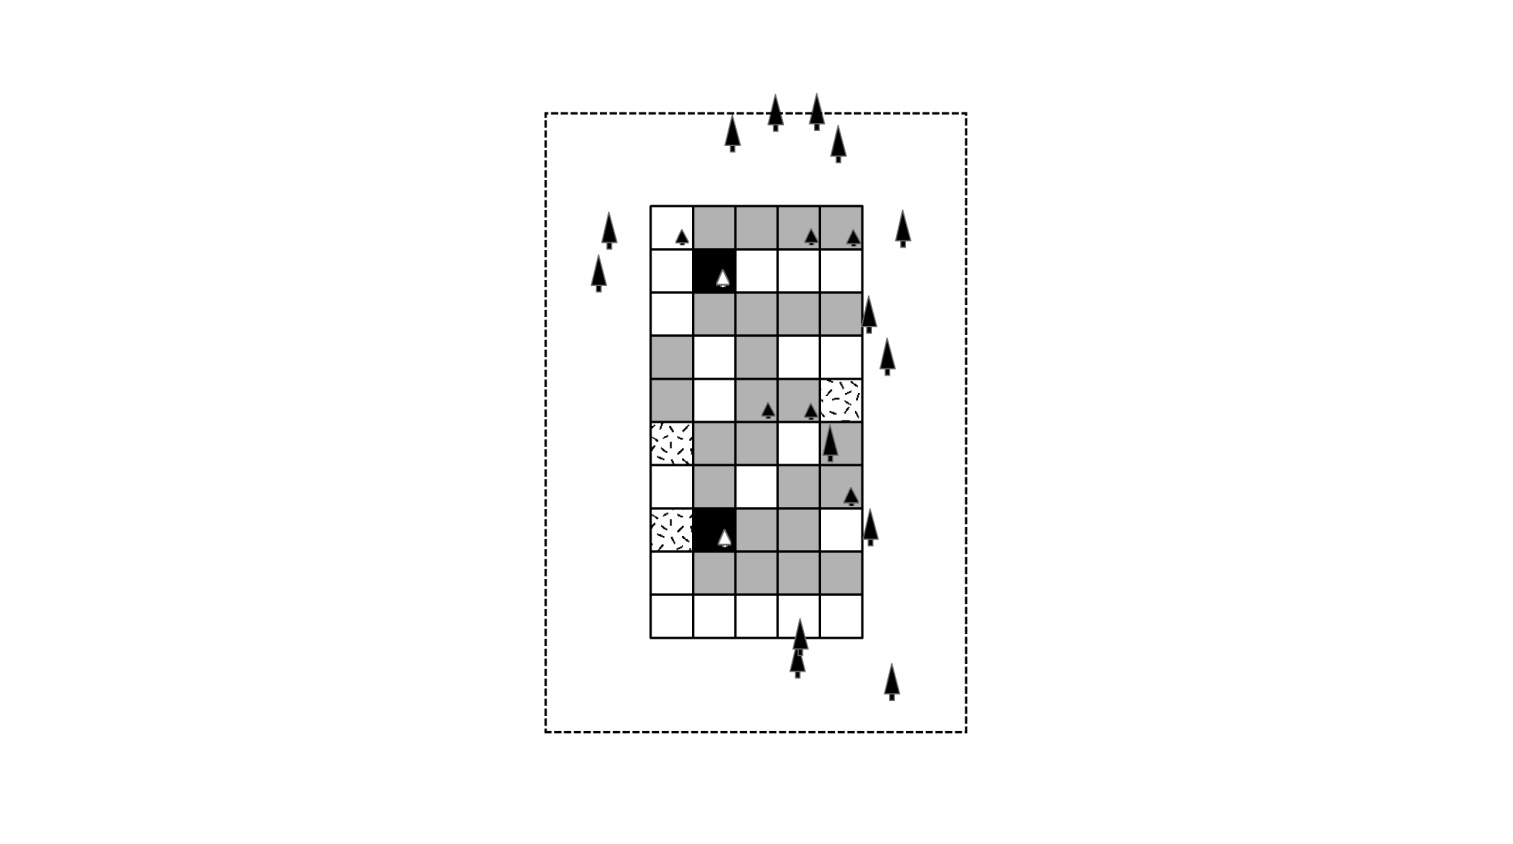

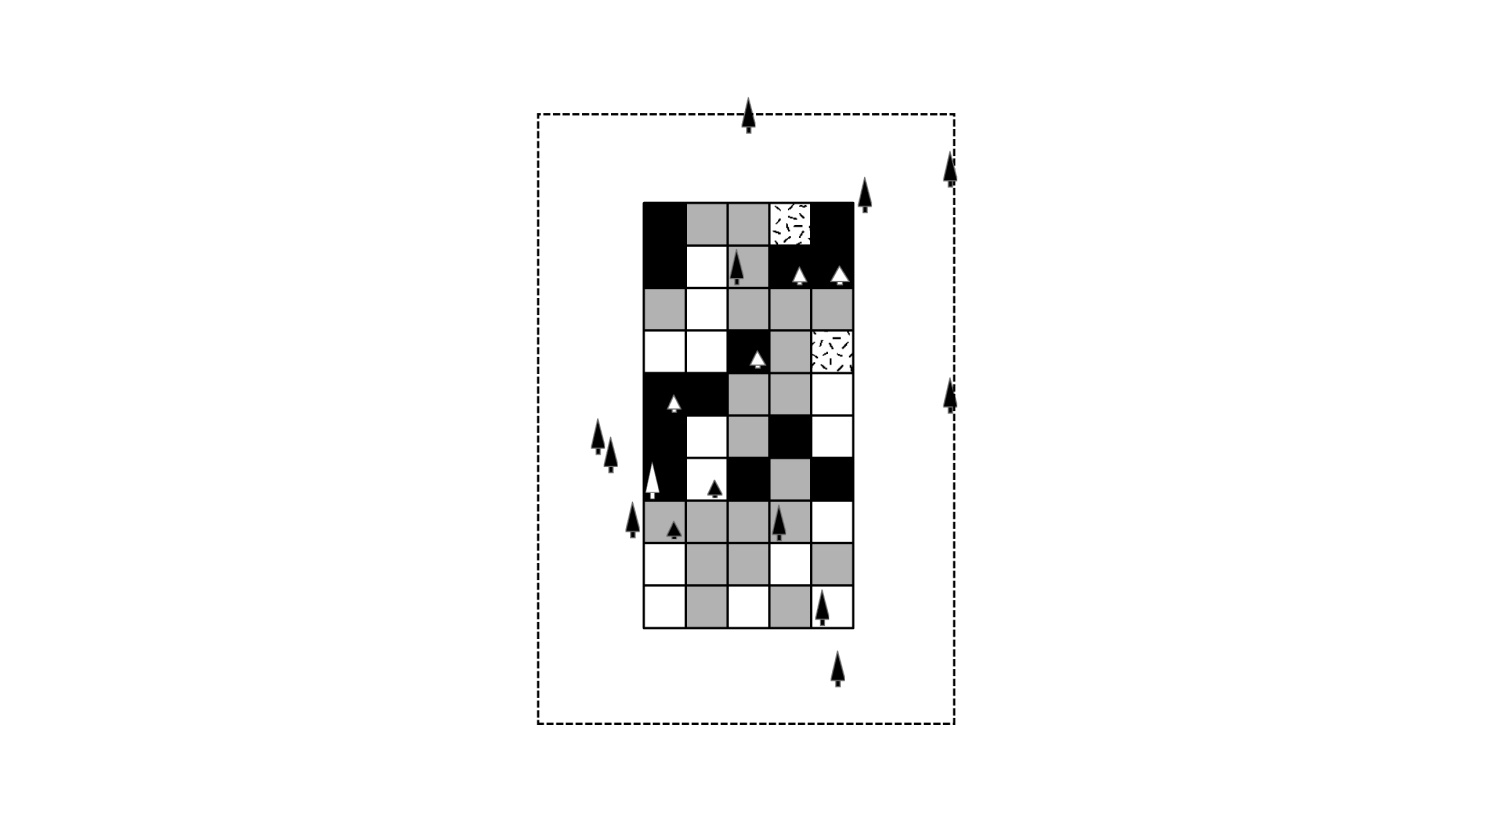

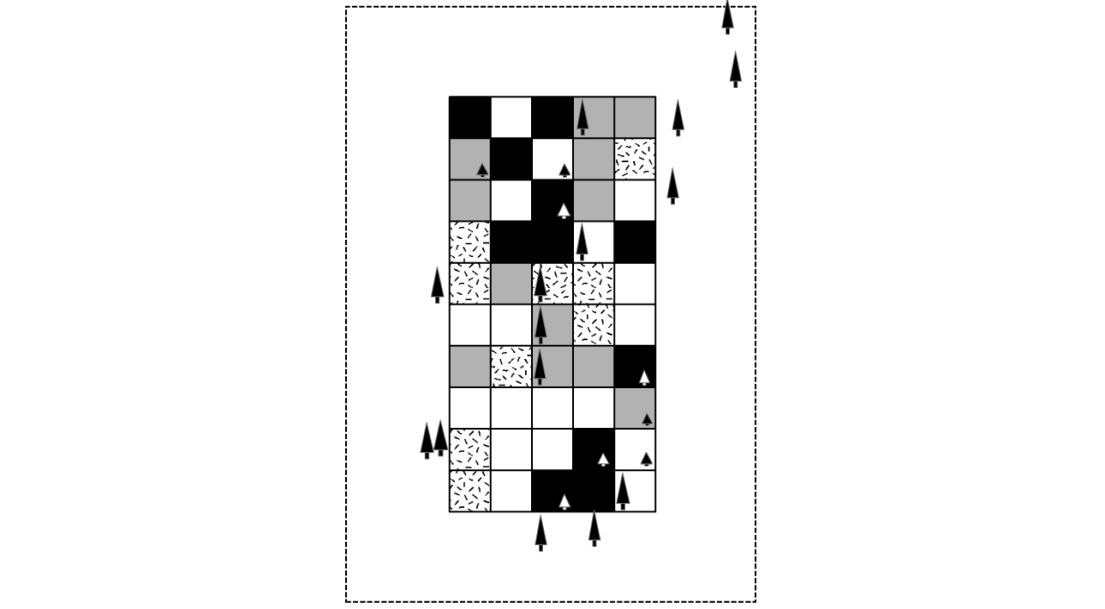


Site 5(a) 37-52 years old

Site 4(b) 46-52 years old

Site 4(a) 46-52 years old

Site 3(b) 51-71 years old


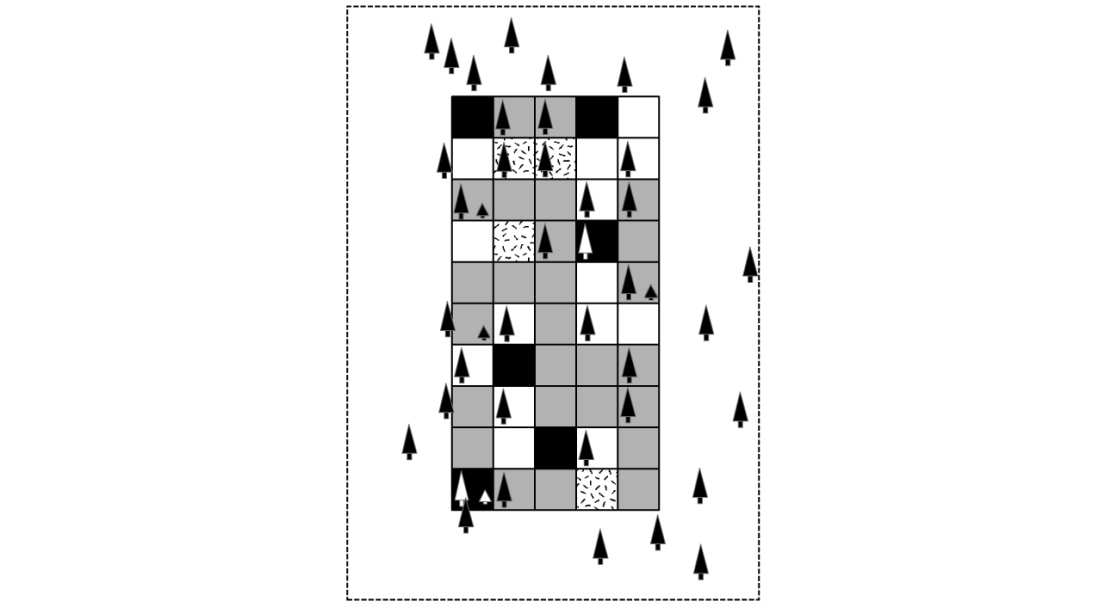

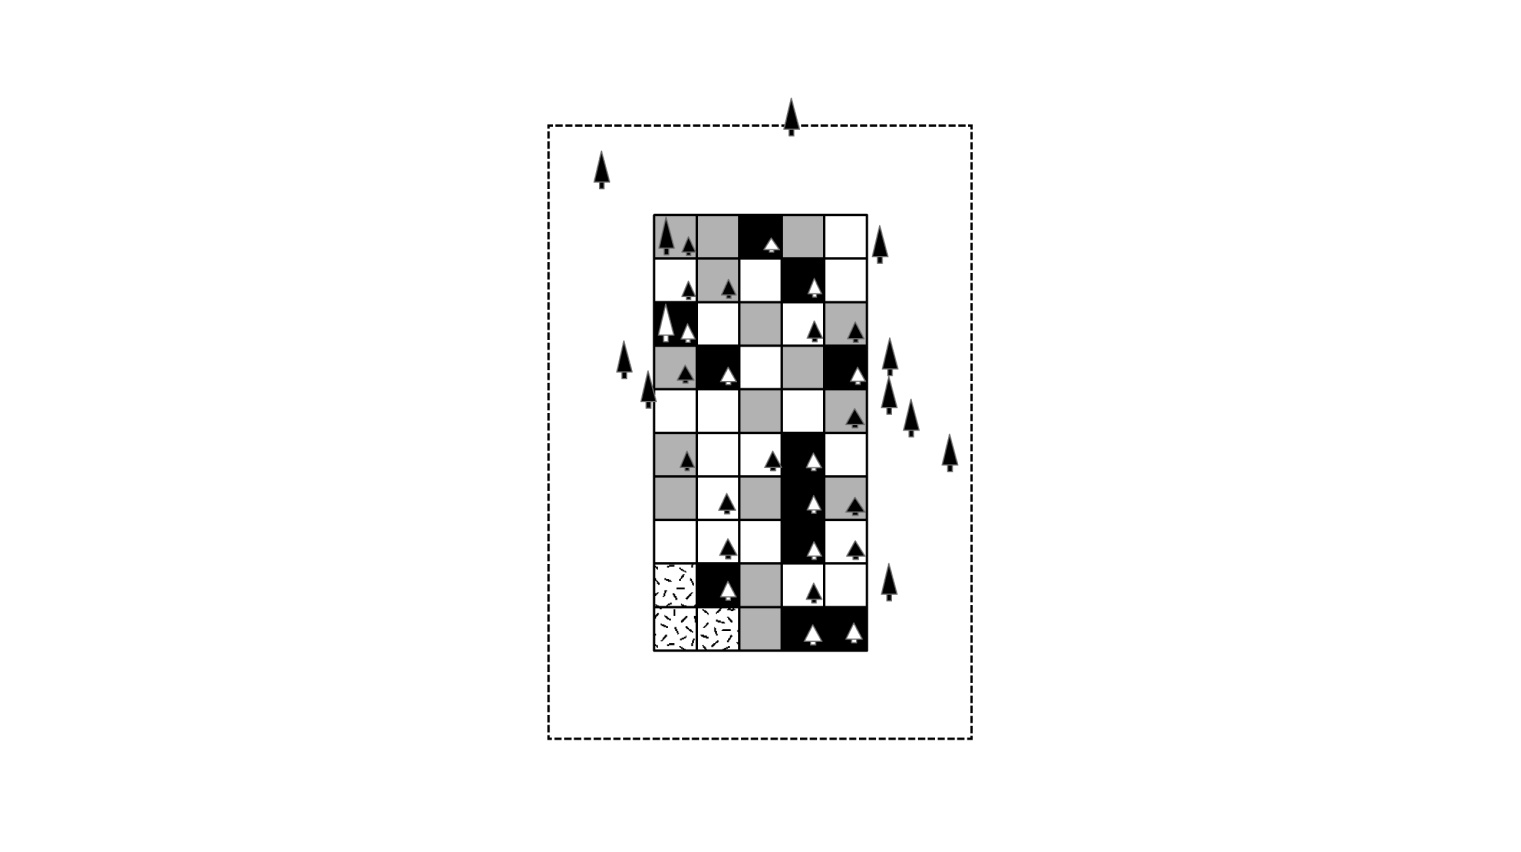

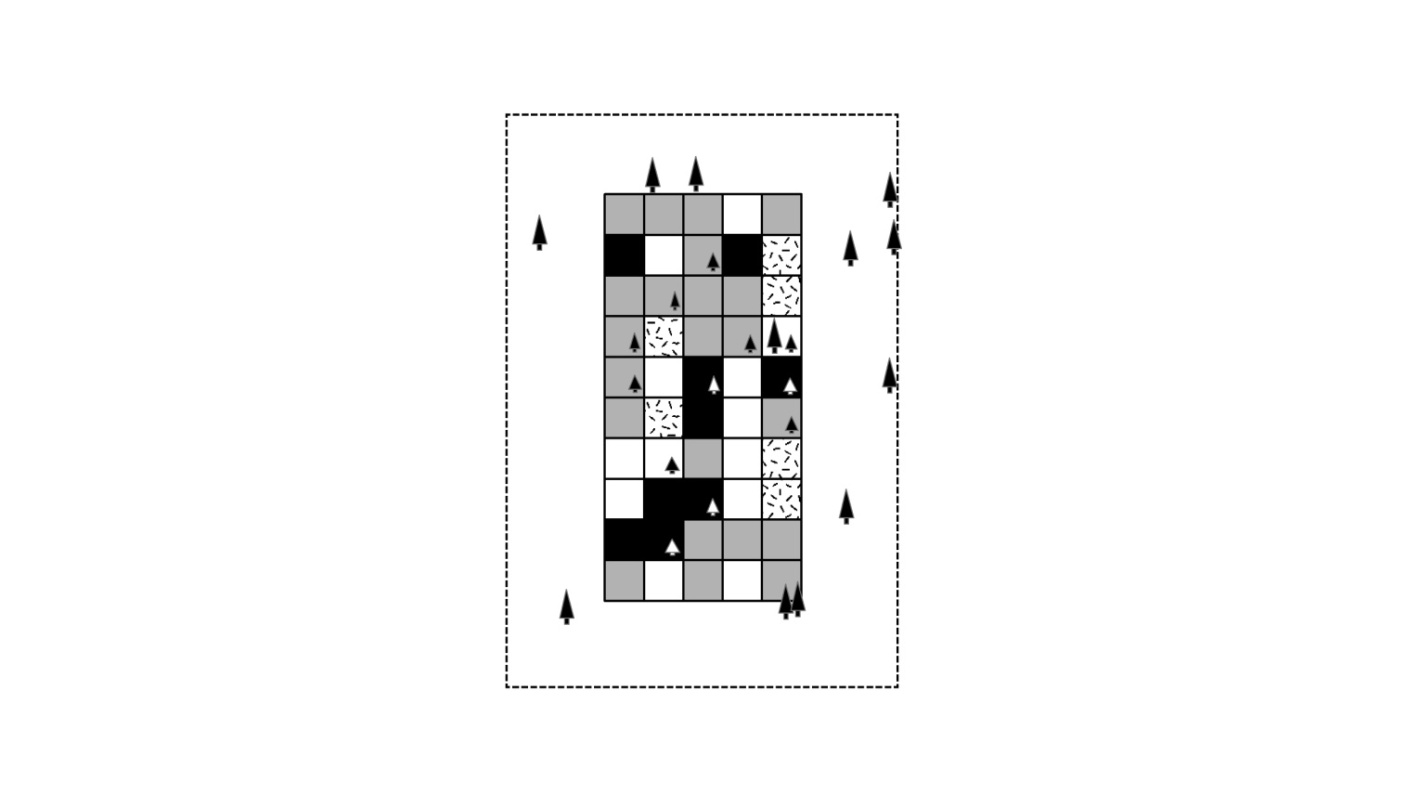

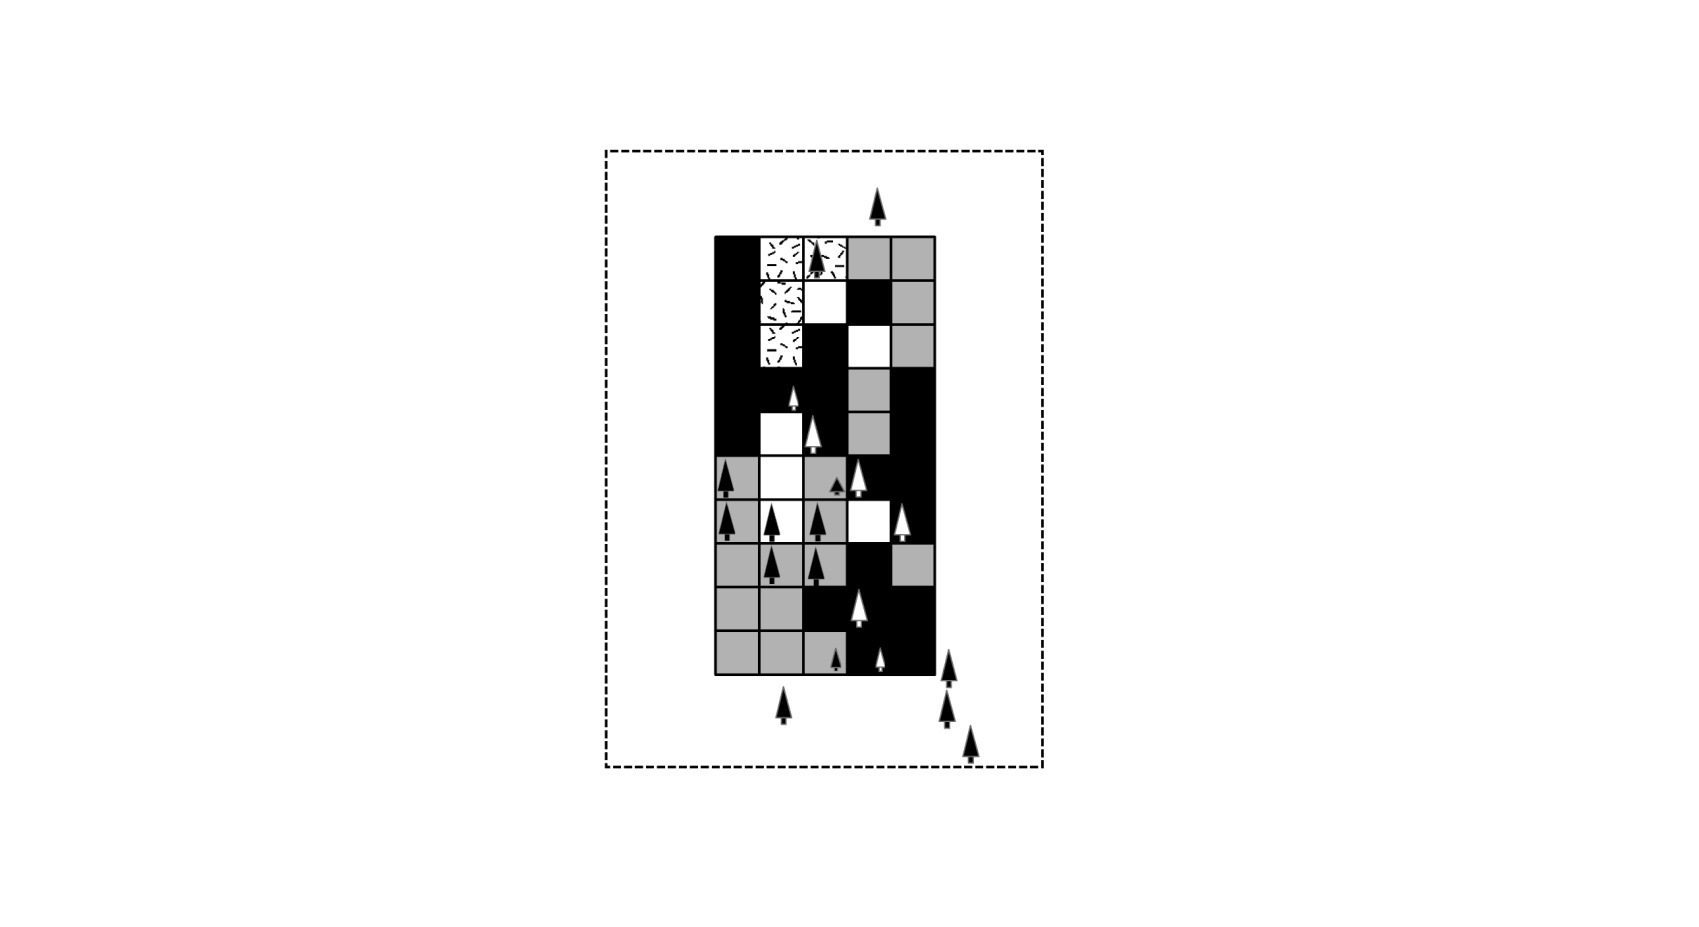


Site 6(b) 48-60 years old

Site 6(a) 48-60 years old

Site 5(b) 37-52 years old

Site 7(a) 55-74 years old


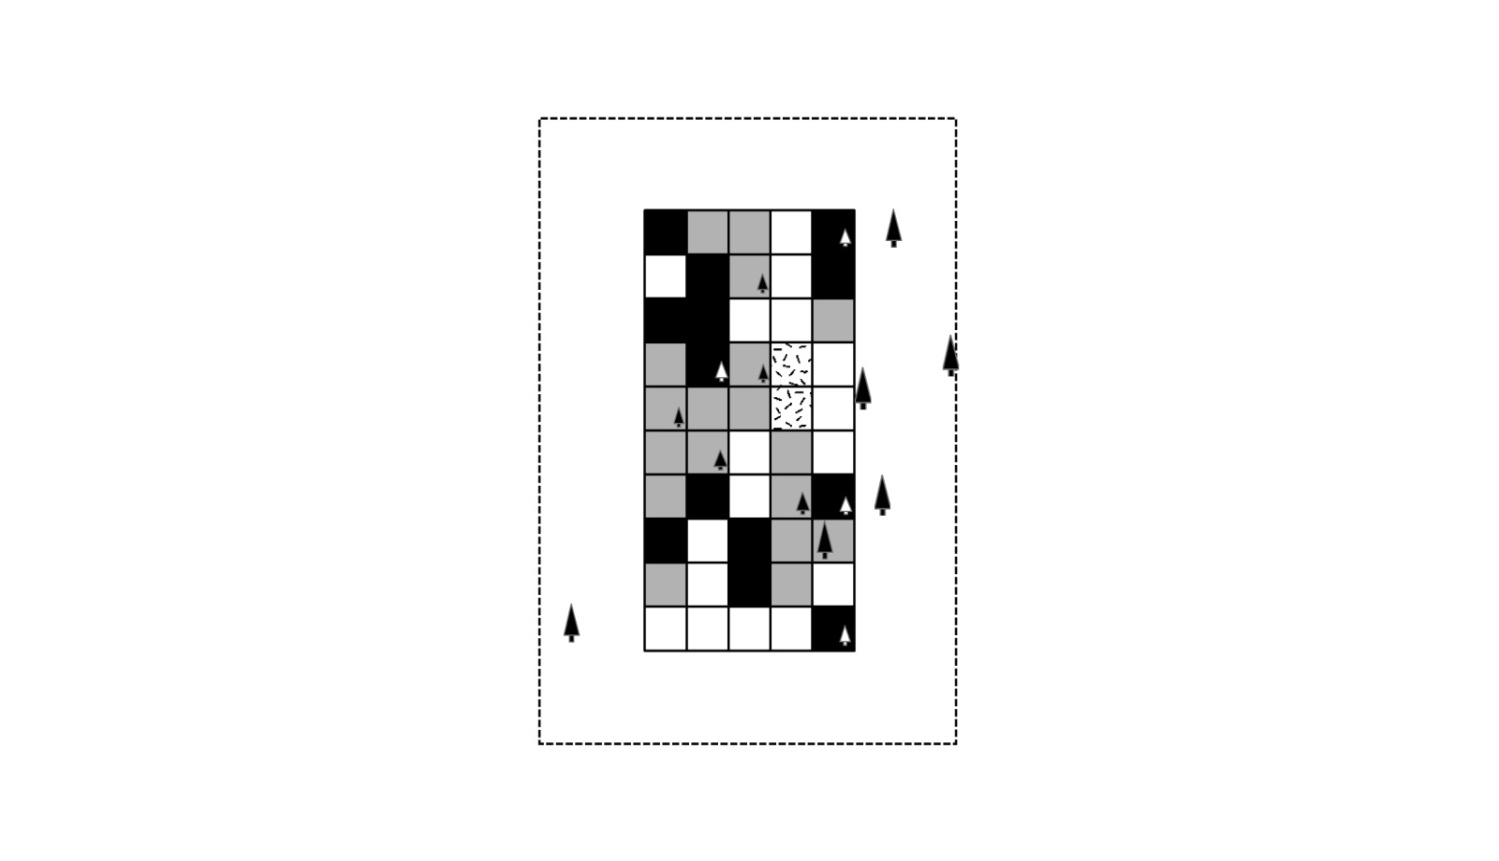

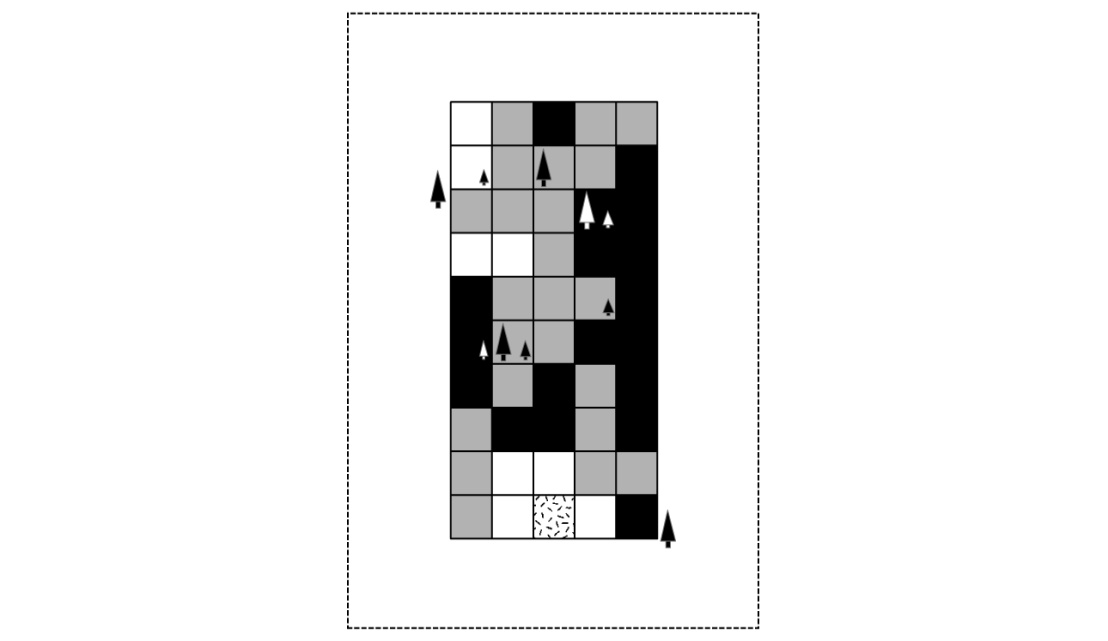

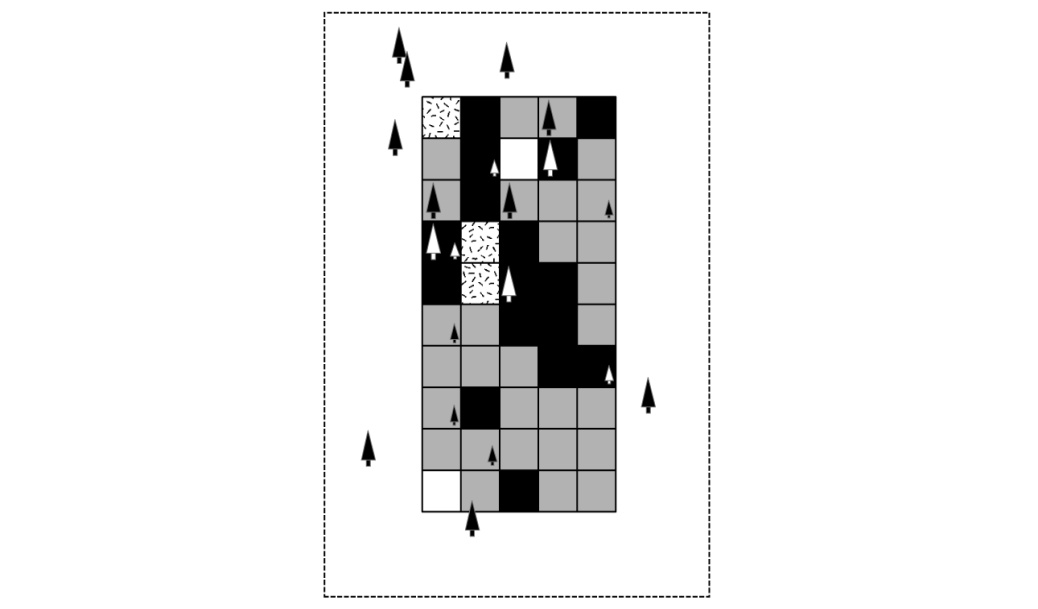

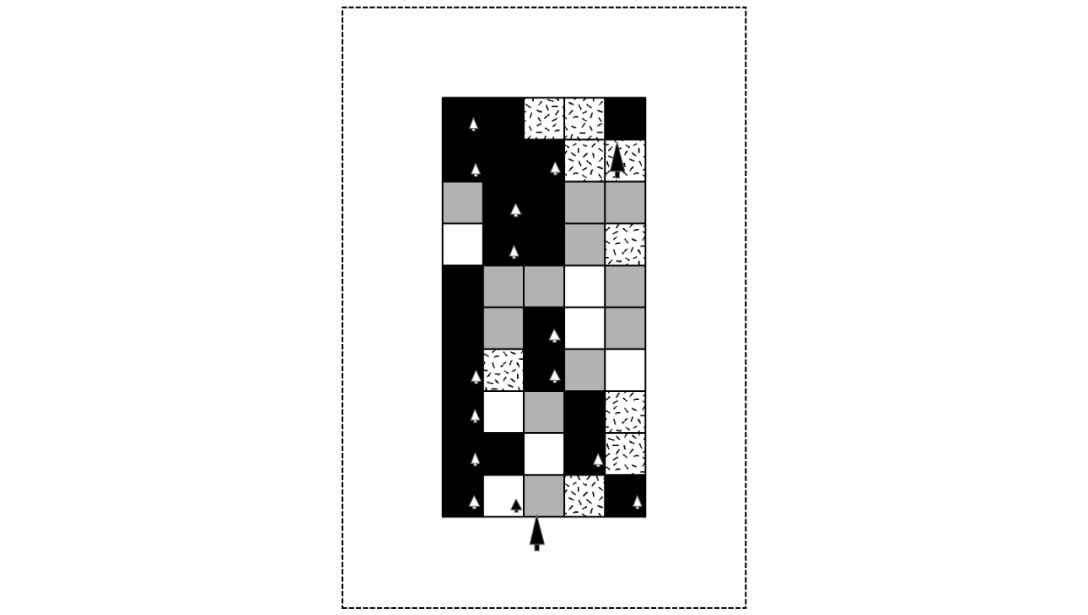


Site 7(b) 55-74 years old

Site 9(b) 60-85 years old

Site 9(a) 60-85 years old

Site 8 62-71 years old


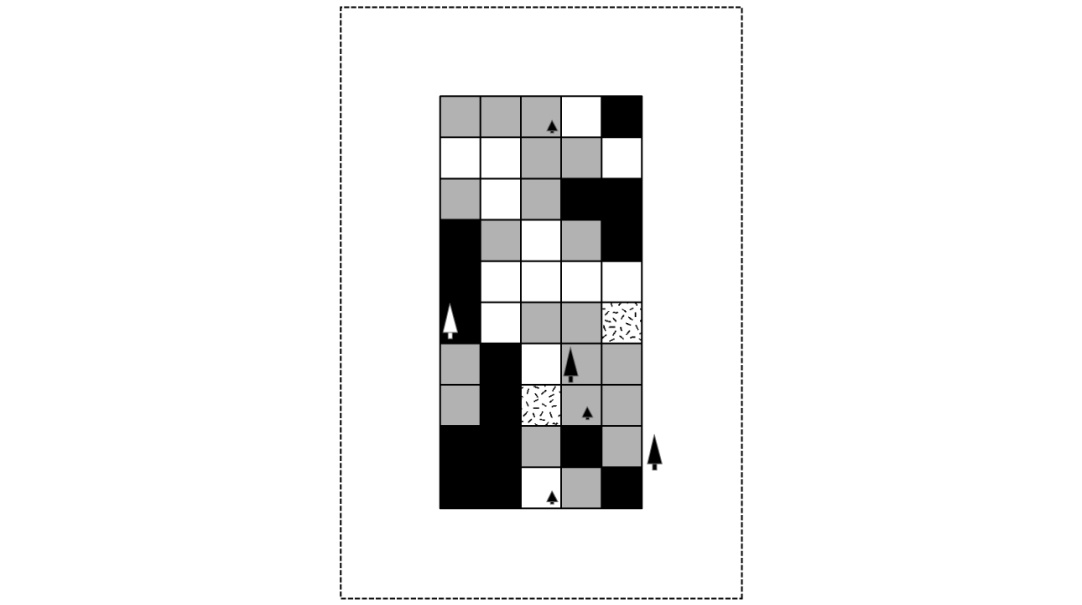

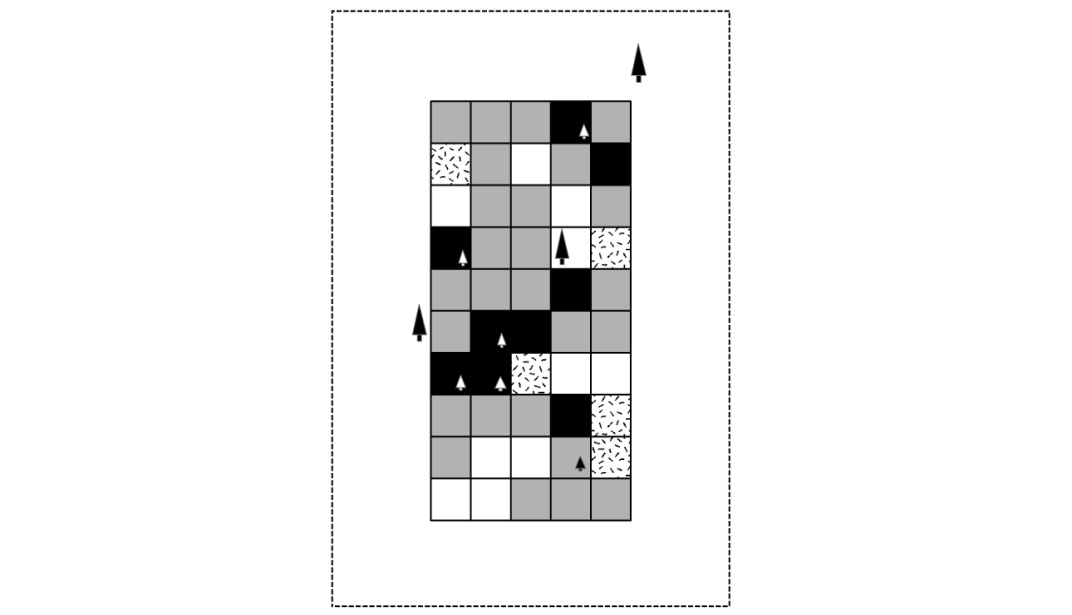

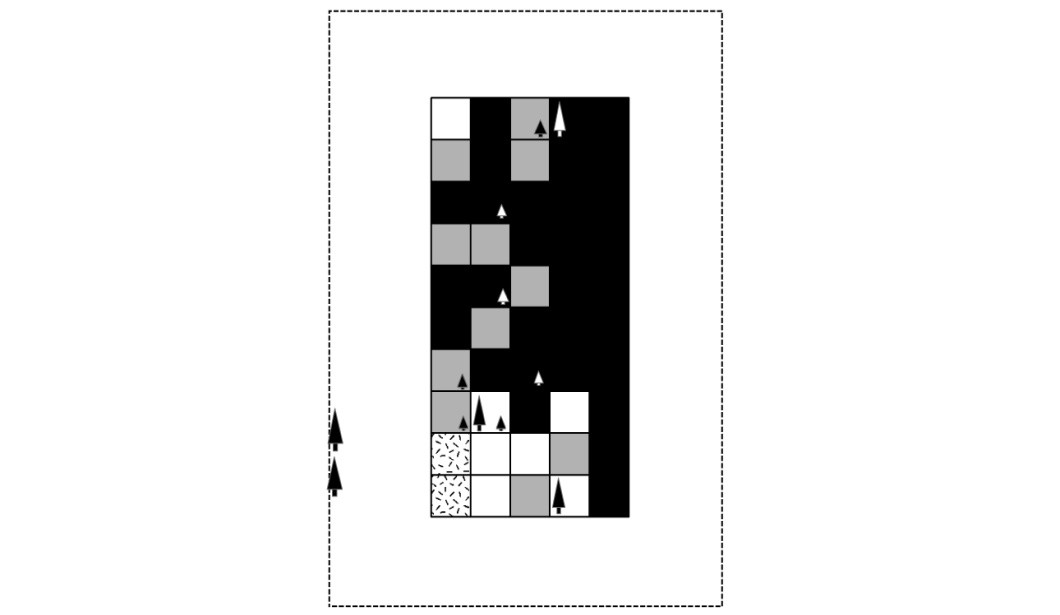

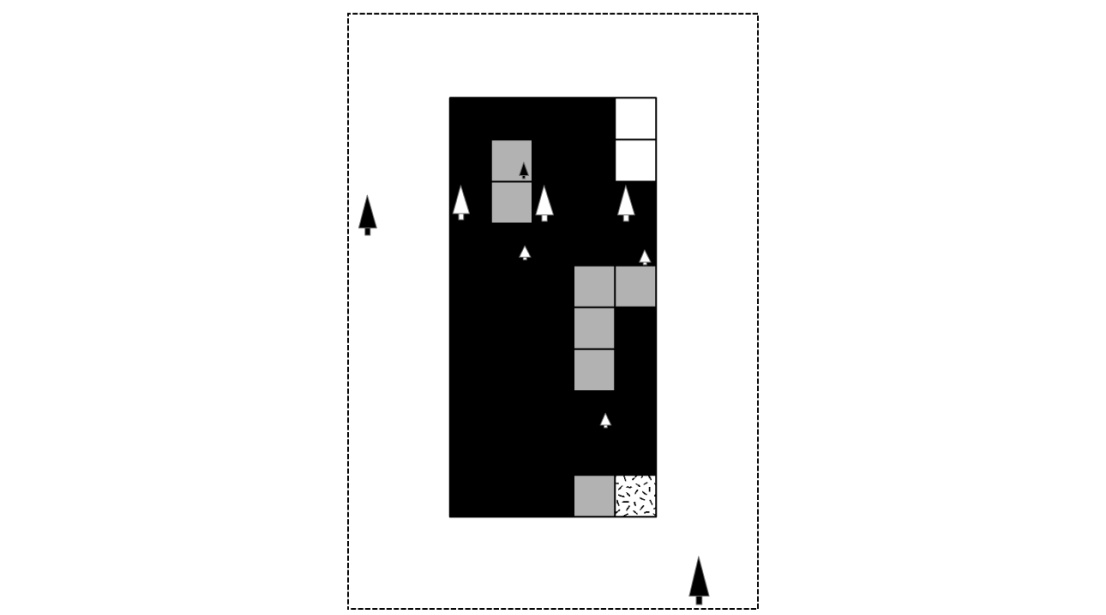


Site 11(a) 73-104 years old

Site 11(b) 73-104 years old

Site 10(b) 60-77 years old

Site 10(a) 60-77 years old


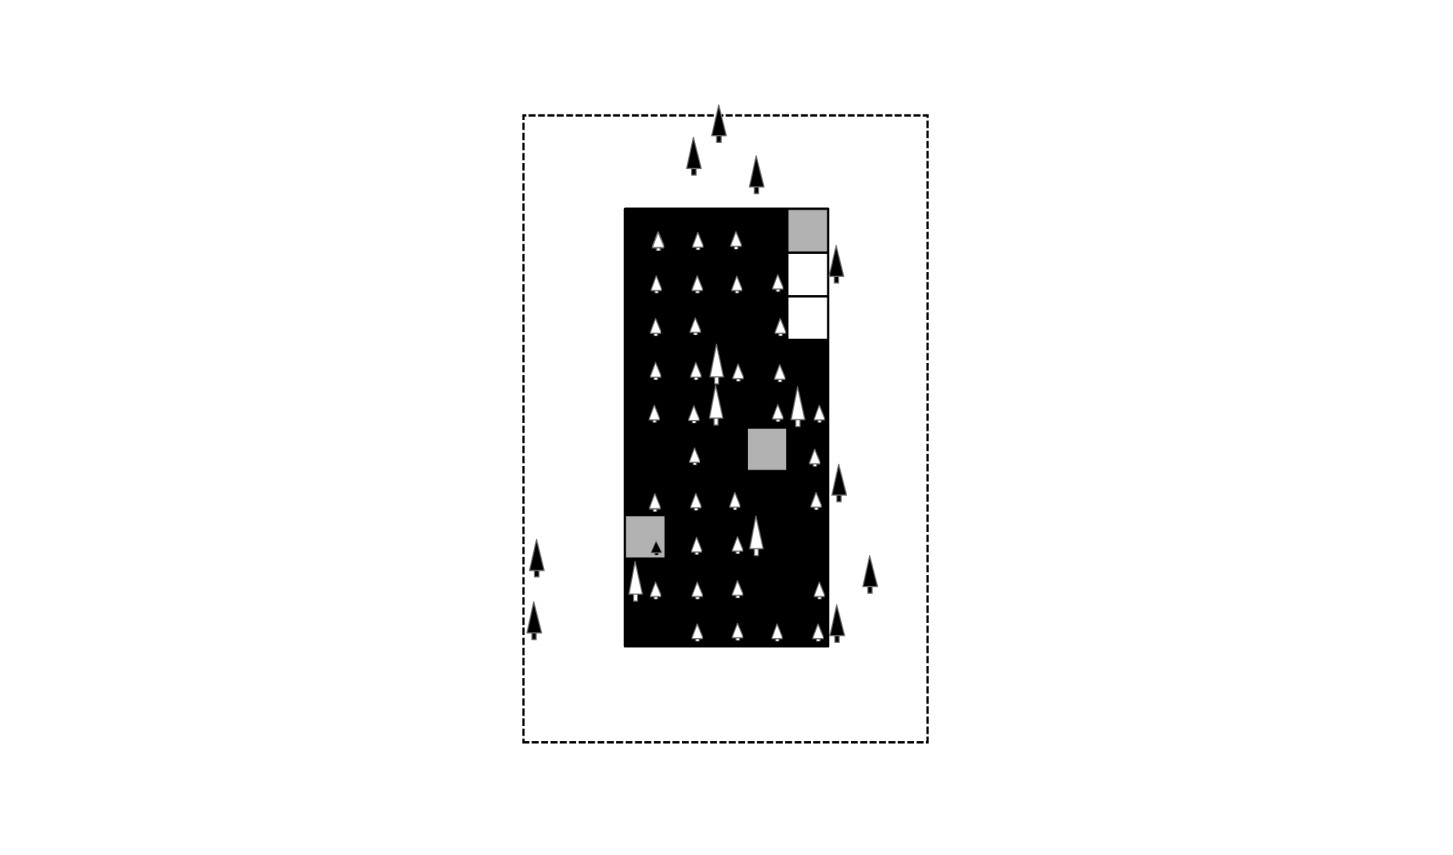

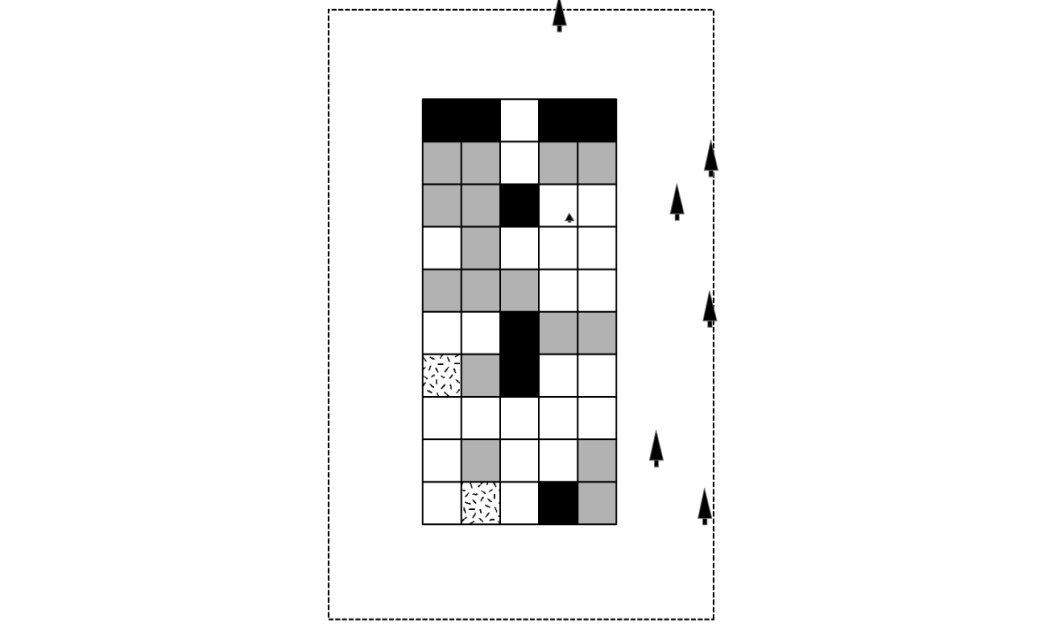


Symbol legend:

 : presence of one or more seed trees (white spruce)

 : presence of spruce regeneration, seedlings ≤ 150 cm in height

: limit of 5 m buffer zone around the SU perimeter

Seedbed substrate legend:

Absence of rotten wood

Presence of rotten wood with 5 to 9% cover

Presence of rotten wood with 10 to 14% cover

Presence of rotten wood with ≥ 15% cover

Site 12(b) 70-75 years old

Site 12(a) 70-75 years old

**B**


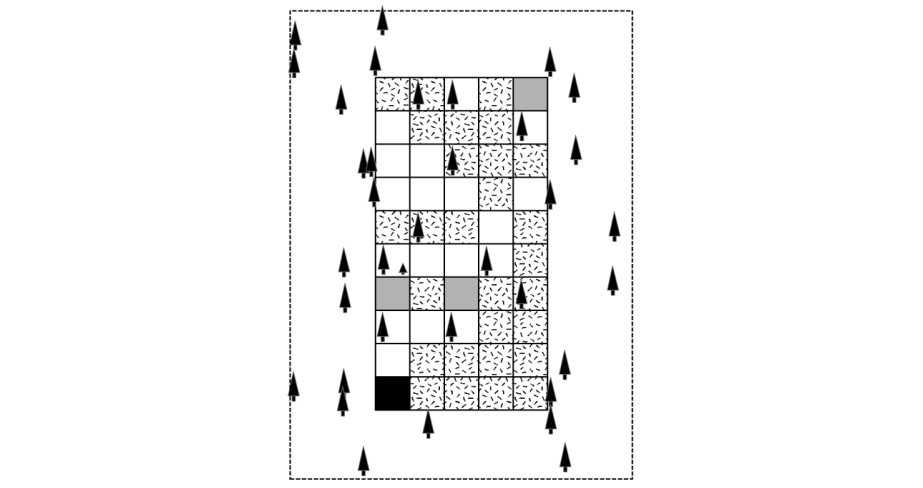

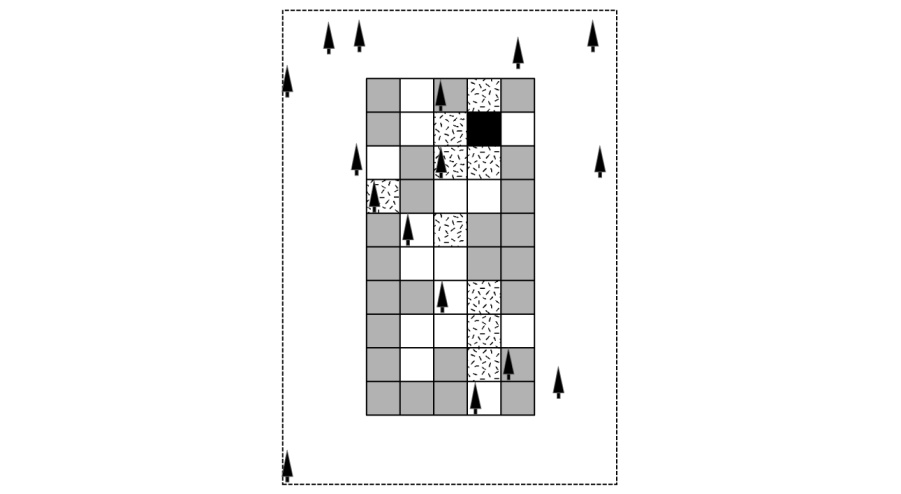

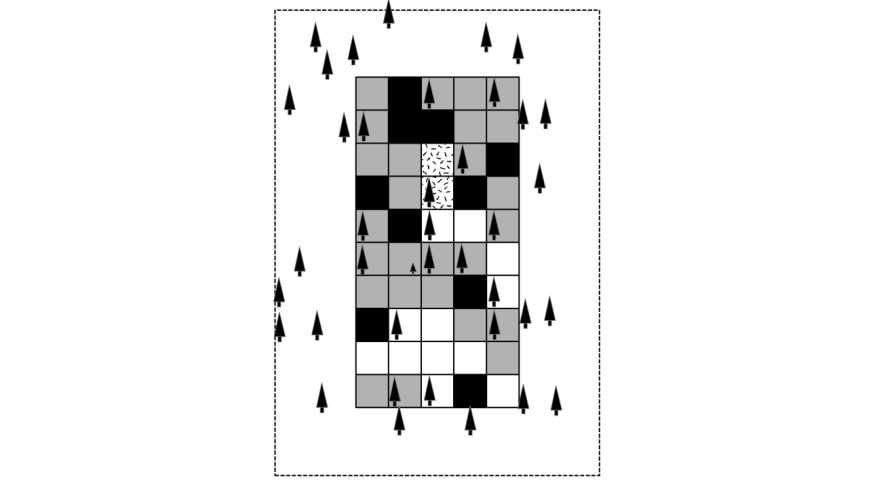

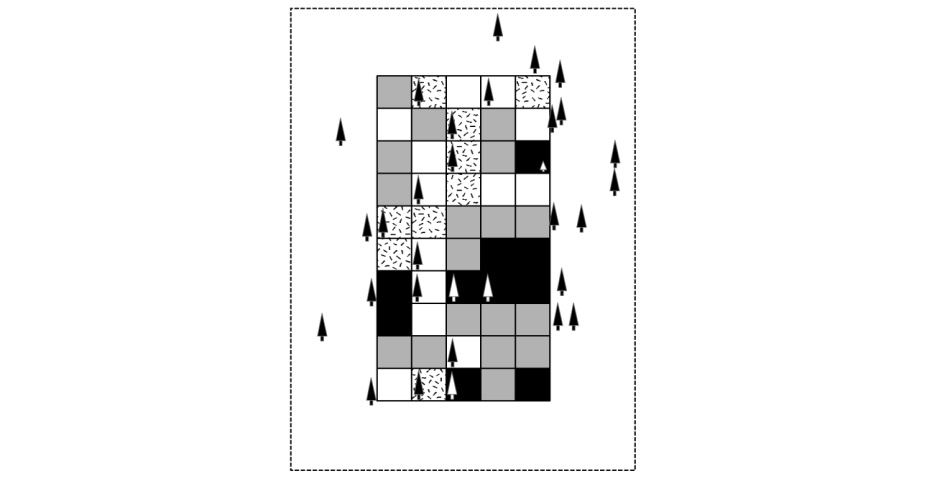


Site 13(d) 82 years old

Site 13(c) 82 years old

Site 13(b) 82 years old

Site 13(a) 82 years old


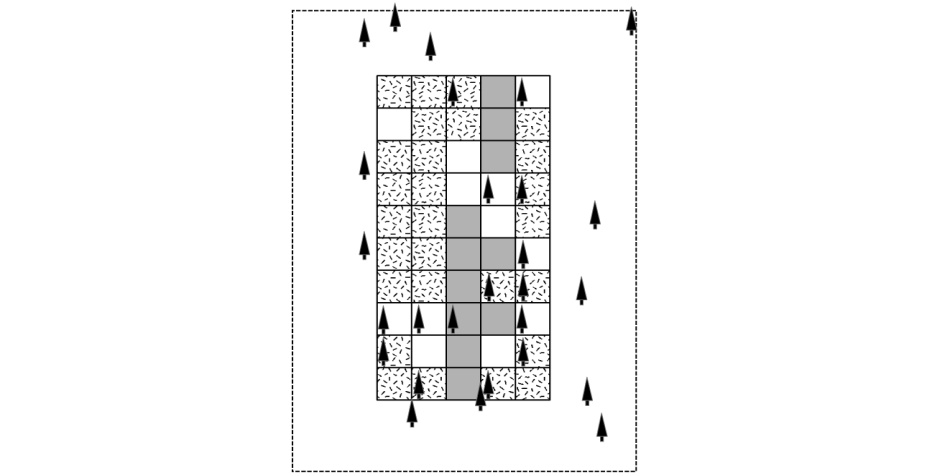

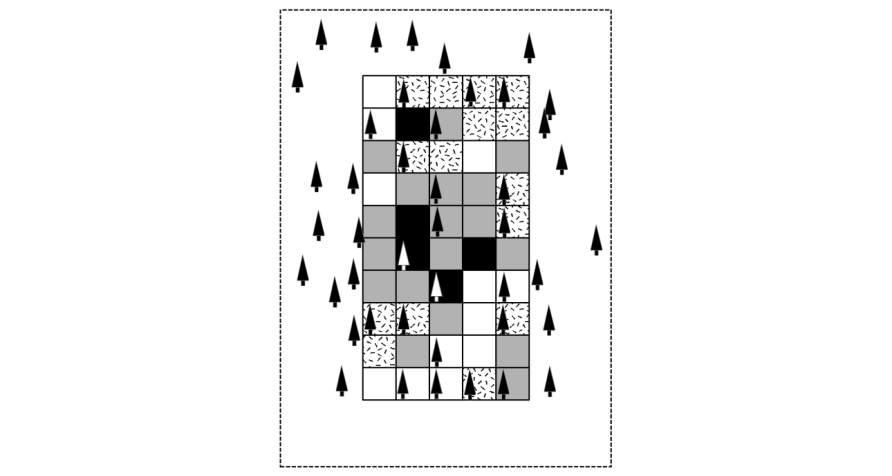

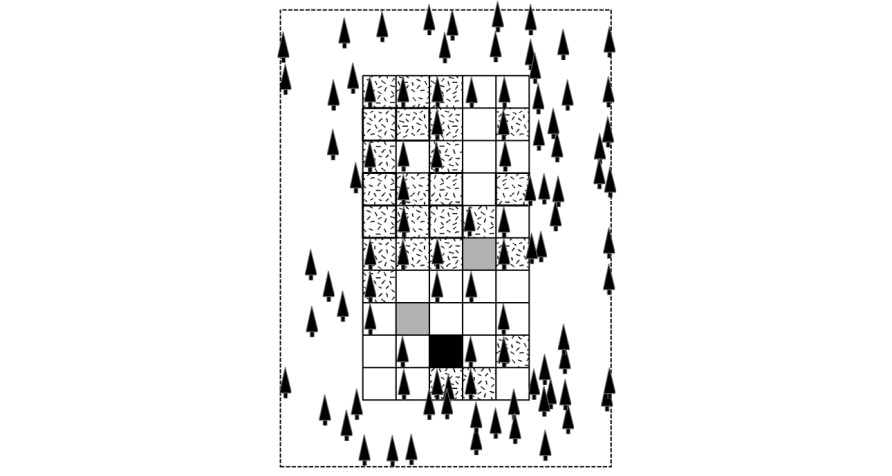

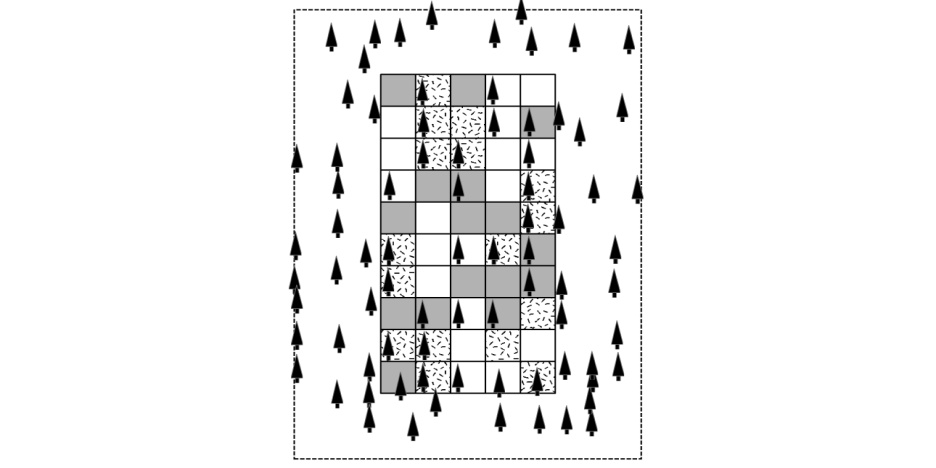


Site 15(b) 49 years old

Site 15(a) 49 years old

Site 14(b) 57 years old

Site 14(a) 57 years old


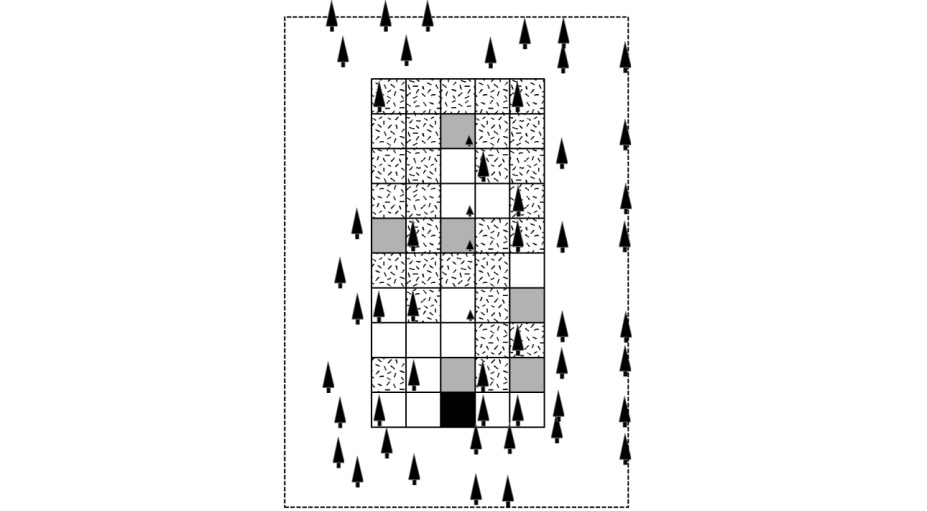

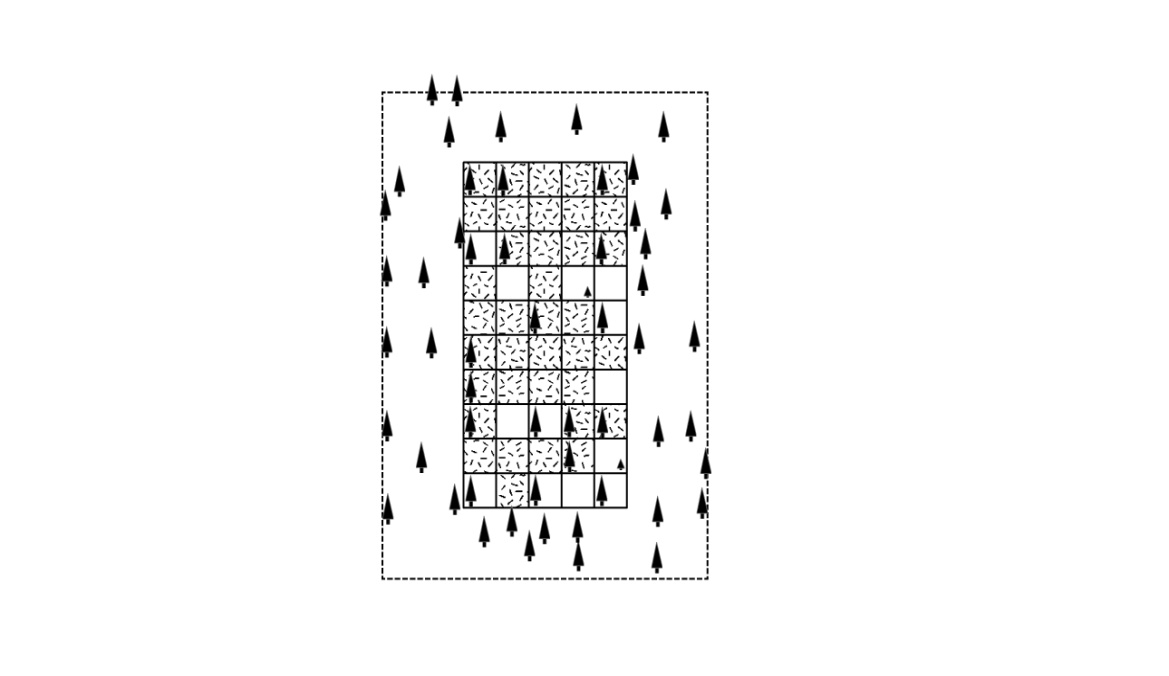

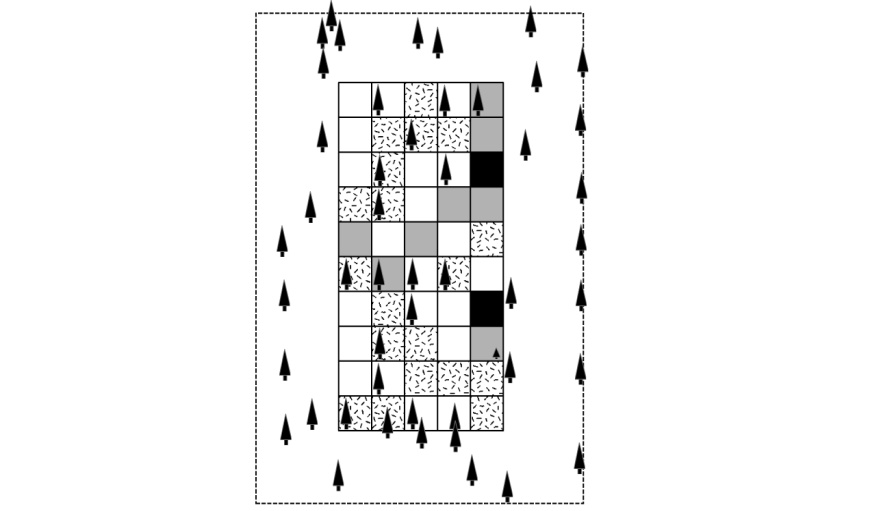

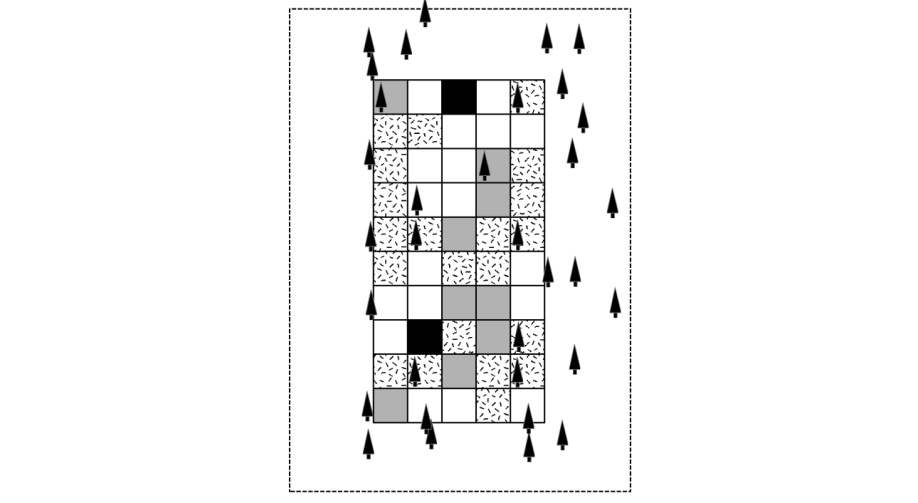


Site 17(b) 57 years old

Site 17(a) 57 years old

Site 16(b) 52 years old

Site 16(a) 52 years old

Figure S1. Illustration of the spatial distribution of seed trees, of regeneration and of the rotten wood seedbed substrate in the 200 m2 sampling units, and spatial distribution of white spruce seed trees in the buffer zone of (A) naturals stands and (B) plantations.

**Acknowledgements**: Funding for this study was provided by the Chaire de recherche sur la forêt habitée of the Université du Québec à Rimouski, the Conférence Régionale des ÉluEs du Bas-Saint-Laurent and the Ministère des Ressources naturelles et de la faune du Québec. We would like to thank Nicolas Roy, Philippe Roy for their help with the fieldwork and data collection. Special thanks to Dr. Alain Caron for reviewing our statistical analyses.

**Authors contributions**: L.G., L.S. and L.L. conceived and designed the experiment; L.G. analyses the data, L.S. and L.L. contributed materials tools, L.G. wrote the paper.

**Conflicts of interest**: The authors declare no conflict of interest.

**References**

1. **Bauhus**, J.; Puettmann, K.; Messier, C. Silviculture for old-growth attributes. For. Ecol. Manage. 2009, 258: 525–537.
2. **Bizzari**, L.E.; Collins, C.D.; Brudvig, L.A.; Damschen, E.I. Historical agriculture and contemporary fire frequency alter soil properties in longleaf pine woodlands. For. Ecol. Manage. 2015, 349: 45-54.
3. **Carter**, G.A.; Smith, W.K. Influence of shoot structure on light interception and photosynthesis in conifers. Plant Physiol. 1985, 79: 1038-1043.
4. **Calogeropoulos**, C.; Greene, D.F.; Messier, C.; Brais, S. The effects of harvest intensity and seedbed type on germination and cumulative survivorship of white spruce and balsam fir in northwestern Quebec. Can. J. For. Res. 2004, 34: 1467-1476. doi: 10.1139/X04-036.
5. **Cameron**, A. Determining the sustainable normal irregular condition: A provisional study on a transformed, irregular mixed species stand in Scotland. Scand. J. For. Res. 2007, 22:13-21.
6. **Carswell**, F.E.; Doherty, J.E.; Allen, R.B.; Brignall-Theyer, M.E.; Richardson, S.J.; Wiser, S.K. Quantification of the effects of aboveground and belowground competition on growth of seedlings in a conifer–angiosperm forest. Forest Ecology and Management 2012, 269: 188–196.
7. **Chećko**, E.; Jaroszewicz, B.; Olejniczak, K.; Kwiatkowska-Falińska, A.J. The importance of coarse woody debris for vascular plants in temperate mixed deciduous forests. Can. J. For. Res. 2015, 45: 1154-1163. dx.doi.org/10.1139/cjfr-2014-0473.
8. **Christy**, E.J.; Mack, R. N. Variation in demography of juvenile *Tsuga heterophylla* across the substratum mosaic. Journal of ecology. 1984, 72: 75-91.
9. **Cornett**, M.W.; Reich, P.B.; Puettmann, K.J.; Frelich, L.E. Seedbed and moisture availability determine safe sites for early *Thuja occidentalis* (Cupressaceae) regeneration. Am. J. Bot. 2000, 87 (12): 1807-1814.
10. **Duchesneau**, R.; Morin, H. Early seedling demography in balsam fir seedling banks. Can. J. For. Res. 1999, 29:1502-1509.
11. **Dumais**, D.; Prévost, M. Management for red spruce conservation in Québec: The importance of some physiological and ecological characteristics – A review. The Forestry Chronicle. 2007, 83(3): 378-392
12. **Eis**, S. Development of white spruce and alpine fir seedlings on cut-over areas in the central interior of British Columbia. The Forestry Chronicle. 1965, 41(4): 419-431.
13. **Frank**, R.M. *Abies balsamea* (L.) Mill. Balsam fir. *in* Burns, R.M. et Honkola, B.H. Silvics of North America 1990, Vol. 1. Conifers. ISBN-13: 978-0160271458. USDA Forest Service Agriculture Handbook 654 p.
14. **Gärtner**, S.M.; Lieffers, V.J.; Macdonald, S.E. Ecology and management of natural regeneration of white spruce in the boreal forest. Environmental Reviews 2011, 19:461-478.
15. **Greene**, D.F.; Johnson, E.A. Estimating the mean annual seed production of trees. Ecology, 1994, 75:642-647.
16. **Greene**, D.F.; Johnson, E.A. Seed mass and early survivorship of tree species in upland clearings and shelterwood. Can. J. For. Res. 1998, 28: 1307-1316.
17. **Greene**, D.F.; Zasada, J.C.; Sirois, L.; Kneeshaw, D.D.; Morin, H.; Charron, I.; Simard, M-J. A review of the regeneration dynamics of North American boreal forest tree species. Can. J. For. Res. 1999, 29: 824-839.
18. **Greene**, D.F. Sexual recruitment of trees in strip cuts in eastern Canada. Can. J. For. Res. 2000, 30: 1256-1263.
19. **Groupe** d’experts sur la sylviculture intensive de plantations (GESIP), La sylviculture intensive de plantations dans un contexte d’aménagement écosystémique – Rapport du groupe d’experts, sous la direction de M. Barrette et M. Leblanc, Québec, 2013; Gouvernement du Québec ISBN 978-2-550-69378-9 112 p. Numéro de publication : DAEF-0354
20. **Hellum**, A. K. Grading seed by weight in white spruce. Tree Planters' Notes 1976, 27(l):16-17, 23-24.
21. **Hély**, C.; Bergeron, Y.; Flannigan. Coarse woody debris in the southeastern Canadian boreal forest: composition and load variations in relation to stand replacement. 2000, Can. J. For. Res. 30: 674–687.
22. **Klopcic**, M.; Bončina, A., Recruitment of tree species in mixed selection and irregular shelterwood forest stands. Ann. For. Sci. 2012, 69: 915–925.
23. **Kneeshaw**, D.D.; and Bergeron, Y. Ecological factors affecting the abundance of advance regeneration in Quebec's southwestern boreal forest. Can. J. For. Res. 1996, 26: 888-898.
24. **Kuehne**, C.; Puettmann, K. J. Natural regeneration in thinned Douglas-stands in western Oregon. J. sustainable for. 2008, 27(3): 246-274. doi: 10.1080/10549810802256221.
25. **Kuuluvainen**, T.; Kalmari, R. Regeneration microsites of Picea abies seedlings in a windthrow area of boreal old-growth forest in southern Finland. Ann. Bot. Fennici 2003, 40: 401-413.
26. **Leinonen**, K.; Leikola, M.; Peltonen, A.; Räsänen, P.K. Kuusen luontainen uudistuminen Pirkka-Hämeen metsälautakunnassa. Summary : Natural regeneration of Norway spruce in Pirkka-Häme Forestry Board District, southern Finland. Acta For. Fennica 1989, 209:1-53.
27. **Lieffers**, V. J.; Stadt, K.J.; Navratil, S. Age structure and growth of understory white spruce under aspen. Can. J. For. Res. 1996, 26: 1002-1007.
28. **Lieffers**, V.J.; Messier, C.; Stadt, K.J.; Gendron, F.; Comeau, P.G. Predicting and managing light in the understrory of boreal forests. Can. J. For. Res. 1999, 29: 796–811.
29. **Lundqvist**, L. Stand development in uneven-aged sub-alpine *Picea abies* stands after partial harvest estimated from repeated surveys. Forestry, 2004, 77(2):120-129.
30. **Lundqvist**, L.; Chrimes, D.; Elfving, B.; Mörling, T.; Valinger, E. Stand development after different thinnings in two uneved-aged *Picea abies* forest in Sweden. For. Ecol. Manage. 2007, 238: 141-146.
31. **Lundqvist**, L.; Nilson, K. Regeneration dynamics in an uneven-aged virgin Norway spruce forest in northern Sweden. Scand. J. For. Res. 2007, 22: 304-309. doi: 10.1080/02827580701479717.
32. **Malcolm**, D.C.; Mason, W.L.; Clarke, G.C. The transformation of conifer forests in Britain – regeneration gap size and silvicultural systems. For. Ecol. Manag. 2001, 151: 7-23.
33. **McLauchlan**, K. The nature and longevity of agricultural impacts on soil carbon and nutrients: a review. Ecosystems 2006, 9: 1364–1382.
34. **McNabb**, D.H.; Startsev, A.D.; Nguyen, H. Soil wetness and traffic level effects on bulk density and air-filled porosity of compacted forest soils. Soil Sci. Soc. Am. J. 2001, 65: 1238–1247.
35. **Messier**, C.; Doucet, R.; Ruel, J-C.; Claveau, Y.; Kelly, C.; Lechowicz, M.J. Functional ecology of advance regeneration in relation to light in boreal forests. Can. J. For. Res. 1999, 29: 812-823.
36. **Niensteadt**, H.; Zasada, J.C. *Picea glauca* (Moench) Voss. White spruce. *In* Burns, R.M. and Honkola, B.H. Silvics of North America Vol. 1. Conifers. 1990, ISBN-13: 978-0160271458. USDA Forest Service Agriculture Handbook 654 p.
37. **Nilson**, K.; Lundqvist, L. Effect of stand structure and density on development of natural regeneration in two Picea abies stands in Sweden. Scand. J. For. Res. 2001, 16: 253–259.
38. **Noguchi**, M.; Okuda, S.; Miyamoto, K.; Itou, T.; Inagaki, Y. Composition, size structure and local variation of nat­urally regenerated broad-leaved tree species in hinoki cypress plantations: a case study in Shikoku, southwestern Japan. Forestry. 2011, 84(5) : 493-504. doi: 10.1093/foresj/CPR027.
39. **Novák**, J.; Slodičák, M. Structure and accumulation of litterfall under Norway spruce stands in connection with thinnings. J. For. Sci. 2004, 50 (3):101-108.
40. **Olson**, M.G.; Meyer, S.R.; Wagner, R.G.; Seymour, R.S. Commercial thinning stimulates natural regeneration in spruce-fir stands. Can. J. For. Res. 2014, 44: 173-181. dx.doi.org/org/10.1139/cjfr-2013-0227.
41. **Palik**, B.; Mitchell, R.J.; Pecot, S.; Battaglia, M.; Pu, M. Spatial distribution of overstory retention influences resources and growth of longleaf pine seedlings. Ecological Applications. 2003, 13(3): 674-686.
42. **Parent**, S.; Messier, C. Effets d’un gradient de lumière sur la croissance en hauteur et la morphologie de la cime du sapin baumier régénéré naturellement. Can. J. For. Res. 1995, 25: 878-885.
43. **Paquette**, A.; Bouchard, A.; Cogliastro, A. A less restrictive technique for the estimation of understorey light under variable weather conditions. For. Ecol. Manage. 2007, 242: 800-804.
44. **Pinheiro**, J.; Bates, D.; DebRoy, S.; Sarkar, D. The R Development Core Team, 2010. nlme: Linear and Nonlinear Mixed Effects Models. R package version 3.1-97.
45. **Place**, I.C.M. The influence of seed-bed conditions on the regeneration of spruce and balsam fir. Canadian Department of Northern Affairs and National Resources, Forestry Branch 1955; Bull. 117.
46. **Prévost**, M. Effect of cutting intensity on microenvironmental conditions and regeneration dynamics in yellow birch – conifer stands. Can. J. For. Res. 2008, 38 : 317-330. doi :10.1139/X07-168.
47. **Rive**, A.C. Enhancing natural regeneration of white spruce (*Picea glauca*) via synchronization of a mast year with site manipulations in Abitibi, Quebec. Master degree. Biology department. Concordia university, Montréal, Québec. 2010.
48. **Robert**, E.; Brais, S.; Harvey, B.D.; Greene, D. Seedling establishment and survival on decaying logs in boreal mixedwood stands following a mast year. Can. J. For. Res. 2012, 42 : 1446-1455. doi :10.1139/X2012-085.
49. **Schütz**, J.P. Opportunities and strategies of transformation regular forests to irregular forests. For. Ecol. Manag. 2001, 151: 87-94.
50. **Schütz**, J.P.; Pommerening, A. Can Douglas fir (Pseudotsuga menziesii (Mirb.) Franco.) sustainable grow in complex forest structures? For. Ecol. Manage. 2013, 303:175-183.
51. **Simard**, M-J.; Bergeron, Y.; Sirois, L. Conifer seedling recruitment in a southeastern canadian boreal forest : The importance of substrate. J. Veg. Sci. 1998, 9(4) : 575-582.
52. **Simard**, M-J.; Bergeron, Y.; Sirois, L. Substrate and litterfall effects on conifer seedling survivorship in southern boreal stands of Canada. Can. J. For. Res. 2003, 33: 672-681. doi : 10.1139/X02-204.
53. **Startsev**, A.D.; D.H. McNabb. Effects of compaction on aeration and morphology of boreal forest soils in Alberta, Canada. Can. J. Soil Sci. 2009, 89: 45–56.
54. **Waldron**, R.M. Factors affecting natural white spruce regeneration on prepared seedbeds at the riding Mountain Forest Experimental Area. Can. Dep. For. Rural Dev. For. Branch Tech. 1966, Note 74.
55. **Wang**, G.G.; Kemball, K.J. Balsam fir and white spruce seedling recruitment in response to understory release, seedbed type, and litter exclusion in trembling aspen stands. Can. J. For. Res. 2005, 35(3): 667–673. doi:10.1139/x04-212.
56. **Warnes**, G.R.; Bolker, B.; Lumley, T.; Johnson, R.C. Contributions from Randall C. Johnson are Copyright 2005. SAIC-Frederick, Inc. Funded by the Intramural Research Program, of the NIH, National Cancer Institute and Center for Cancer Research under NCI Contract NO1-CO-12400. gmodels: Various R programming tools for model fitting. R package version 2.15.0. http://CRAN.R-project.org/package=gmodels.
57. **Zuur,** A.F.; Saveliev A.A.; Ieno E.N.  [Zero inflated models and generalized linear mixed models with R](https://scholar.google.com/scholar_lookup?title=Zero%20inflated%20models%20and%20generalized%20linear%20mixed%20models%20with%20R&author=&publication_year=2012). Newburgh: Highland Statistics Limited 2012, ISBN: 9780957174108
58. **Saucier,** J.-P., Robitaille, A., Grondin, P., Bergeron, J.-F. & Gosselin, J. Les régions écologiques du Québec méridional (4e version). 2011, https://mffp.gouv.qc.ca/forets/inventaire/pdf/carte-regions-ecologiques.pdf
