# Supplementary material for: Seed Rain and Seedling Establishment of <em>Picea glauca</em> and <em>Abies balsamea</em> after Partial Cutting in Plantations and Natural Stands
Source: Preprints.org preprint supplement (doi:10.20944/preprints201808.0515.v1), 2018-08-30
Supplement: Supplementary file 1 [file supplementary]

Archive with 13 entries (13 files):
- Back matter.docx
- Table 1.pdf
- Table 1.docx
- fig5.pdf
- fig5.docx
- fig4.pdf
- fig4.docx
- fig3.pdf
- fig3.docx
- fig2.pdf
- fig2.docx
- fig1.pdf
- fig1.docx
