# Supplementary material for: Seed Rain and Seedling Establishment of <em>Picea glauca</em> and <em>Abies balsamea</em> after Partial Cutting in Plantations and Natural Stands
Source: Preprints.org preprint supplement (doi:10.20944/preprints201808.0515.v1), 2018-08-30
Supplement: Supplementary file 1 [file supplementary › fig1.docx]

**Fir**

**Spruce**

**Natural stands**

**Plantation**

Figure 1. Relationsphip between spruce and fir seed input and seedling density in natural stands and plantations.
