# Supplementary material for: Seed Rain and Seedling Establishment of <em>Picea glauca</em> and <em>Abies balsamea</em> after Partial Cutting in Plantations and Natural Stands
Source: Preprints.org preprint supplement (doi:10.20944/preprints201808.0515.v1), 2018-08-30
Supplement: Supplementary file 1 [file supplementary › fig2.docx]

**Natural stands**

**Plantations**

Figure 2. Stocking coefficient (± standard deviation) of fir (white bar) and spruce (black bar) seedlings before and after partial cut, and total stocking coefficient per species for natural stands and plantations. Lower-case letters indicate a significant difference before and after partial cut for a given species in a stand type, while asterisk indicate a significant difference between stand types for a given species and period and for total stocking.
