# Supplementary material for: Seed Rain and Seedling Establishment of <em>Picea glauca</em> and <em>Abies balsamea</em> after Partial Cutting in Plantations and Natural Stands
Source: Preprints.org preprint supplement (doi:10.20944/preprints201808.0515.v1), 2018-08-30
Supplement: Supplementary file 1 [file supplementary › fig3.pdf]

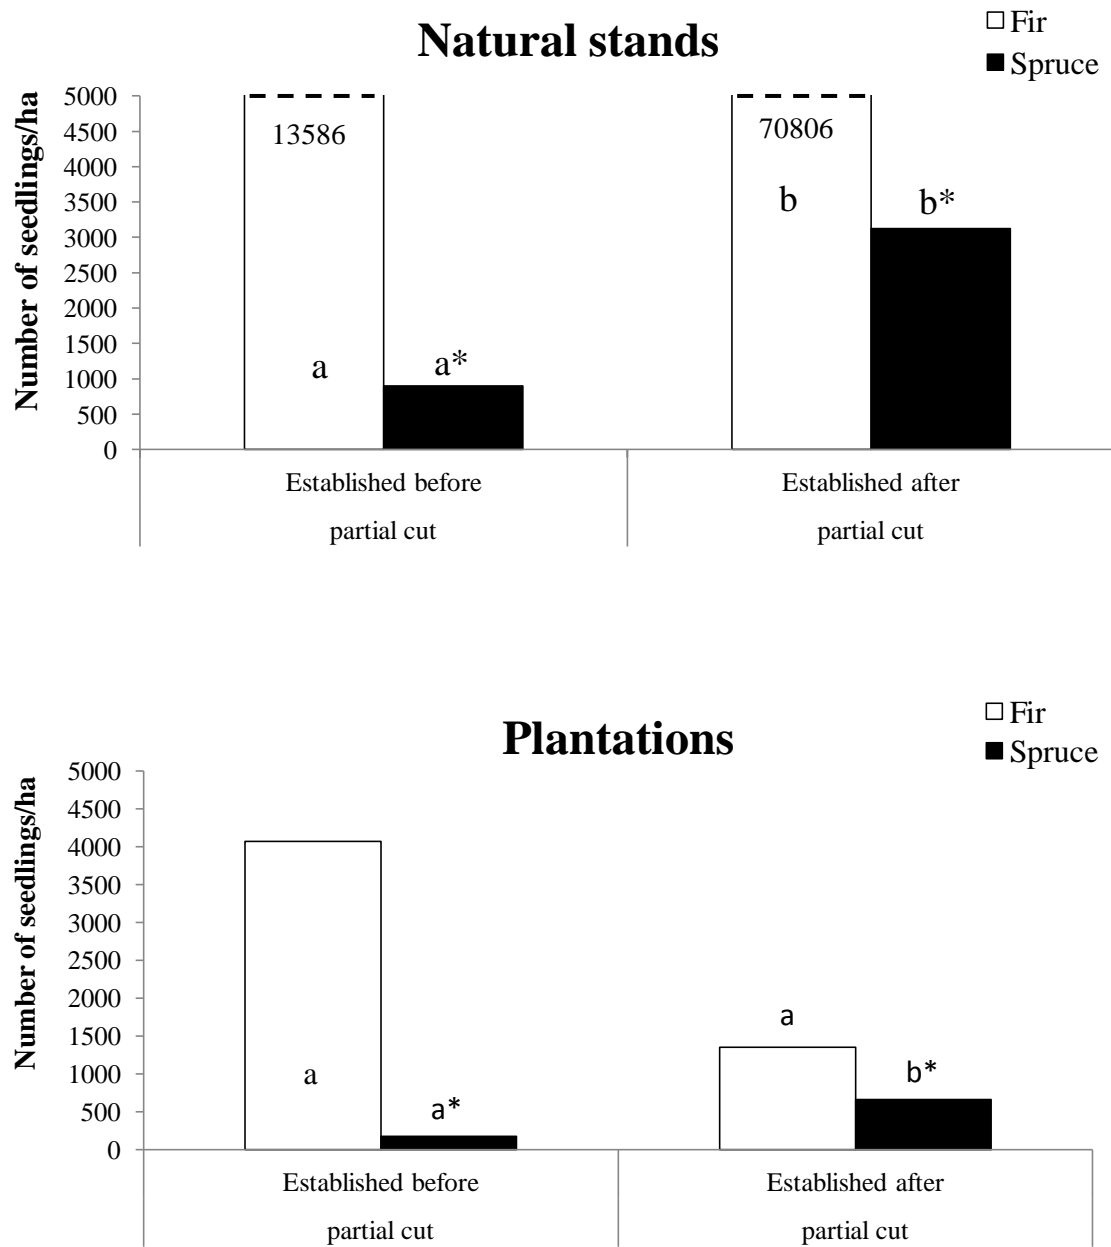

Figure 3. Seedlings density (fir: white bar and spruce: black bar) before and after partial cut for natural stands and plantations. Lower-case letters indicate a significant difference before vs after partial cut for a given species in each stand type, while asterisk indicate a significant difference between species for each stand type in a given period.
