# Supplementary material for: Seed Rain and Seedling Establishment of <em>Picea glauca</em> and <em>Abies balsamea</em> after Partial Cutting in Plantations and Natural Stands
Source: Preprints.org preprint supplement (doi:10.20944/preprints201808.0515.v1), 2018-08-30
Supplement: Supplementary file 1 [file supplementary › fig4.docx]

*n*=194 *n*=925

**Plantations**

Figure 4. Percentage of total seedlings associated to each substrate type and percentage of cover per substrate for natural stands and plantations. An asterisk indicates a significant difference between a substrate cover and the proportion of seedlings found on this substrate for each species (chi-square-test). Lower-case letters indicate a significant difference in substrate cover between stand types (chi-square test).
