# Supplementary material for: Seed Rain and Seedling Establishment of <em>Picea glauca</em> and <em>Abies balsamea</em> after Partial Cutting in Plantations and Natural Stands
Source: Preprints.org preprint supplement (doi:10.20944/preprints201808.0515.v1), 2018-08-30
Supplement: Supplementary file 1 [file supplementary › fig5.docx]

Figure 5. Relationsphip between incident light at 60 cm from the ground and median height for spruce and fir seedlings established after the partial cut in natural stands and plantations combined. *n*=1420 for fir and *n*=529 for spruce in total 1700 subunits of 4 m2.
