# Supplementary material for: Seed Rain and Seedling Establishment of <em>Picea glauca</em> and <em>Abies balsamea</em> after Partial Cutting in Plantations and Natural Stands
Source: Preprints.org preprint supplement (doi:10.20944/preprints201808.0515.v1), 2018-08-30
Supplement: Supplementary file 1 [file supplementary › Table 1.docx]

Table 1. Site description in 2009

| **Origin** | | **Site** | **Age range of dominant tree**  n=6 | **Years after partial cut** | **Stem removal** |  | **BA (m2/ha)** | |  | | **Mean dbh (cm)** | | | | |  | | **Stems/ha** | | | | | |
| --- | --- | --- | --- | --- | --- | --- | --- | --- | --- | --- | --- | --- | --- | --- | --- | --- | --- | --- | --- | --- | --- | --- | --- |
| **%** |  | **spruce** | **fir** | |  | | **spruce** | | | **fir** | |  | | **spruce** | | | **fir** | |
| Natural | | 1 | 37-40 | 10 | 14.0 |  | − | 37 | |  | | − | | | 15 | |  | | − | | | 1850 | |
| 2 | 52-65 | 11 | 67.7 |  | 3 | 26 | |  | | 20 | | | 16 | |  | | 75 | | | 1325 | |
| 3 | 51-71 | 10 | 45.5 |  | 5 | 38 | |  | | 20 | | | 16 | |  | | 150 | | | 1800 | |
| 4 | 46-52 | 9 | 38.2 |  | 4 | 26 | |  | | 18 | | | 15 | |  | | 125 | | | 1400 | |
| 5 | 37-52 | 9 | 36.9 |  | 16 | 15 | |  | | 15 | | | 17 | |  | | 700 | | | 775 | |
| 6 | 48-60 | 9 | 53.0 |  | 2 | 25 | |  | | 21 | | | 16 | |  | | 75 | | | 1100 | |
| 7 | 55-74 | 10 | 27.9 |  | 12 | 26 | |  | | 20 | | | 19 | |  | | 300 | | | 875 | |
| 8 | 62-71 | 9 | 52.1 |  | 5 | 36 | |  | | 20 | | | 14 | |  | | 150 | | | 2000 | |
| 9 | 60-85 | 9 | 11.6 |  | 7 | 32 | |  | | 19 | | | 16 | |  | | 200 | | | 1350 | |
| 10 | 60-77 | 14 | 73.5 |  | 4 | 26 | |  | | 20 | | | 19 | |  | | 75 | | | 825 | |
| 11 | 73-104 | 10 | 74.0 |  | 8 | 26 | |  | | 25 | | | 18 | |  | | 150 | | | 975 | |
| 12 | 70-75 | 23 | 60.4 |  | 7 | 33 | |  | | 20 | | | 18 | |  | | 200 | | | 1225 | |
| Plantation | | 131 | 82 | 30-152 | 42.0 |  | 30 | 2 | |  | | 23 | | | 6 | |  | | 675 | | | 150 | |
| 14 | 57 | 16−62 | 52.6 |  | 40 | − | |  | | 22 | | | − | |  | | 950 | | | − | |
| 15 | 49 | 8 | 44.3 |  | 34 | − | |  | | 17 | | | − | |  | | 1475 | | | − | |
| 16 | 52 | 19−82 | 50.0 |  | 35 | − | |  | | 22 | | | − | |  | | 825 | | | − | |
| 17 | 57 | 12 | 65.6 |  | 29 | − | |  | | 24 | | | − | |  | | 650 | | | − | |
|  | | 1 Four SU were carried out in the same plantation  2Two partial cuts in plantation; in these cases, only seedlings established after the last partial cut were considered in the analyses. | | | | | | | | | | | |  |  | | | | | |  |  | |  | |  |
