# Supplementary material for: Seed Rain and Seedling Establishment of <em>Picea glauca</em> and <em>Abies balsamea</em> after Partial Cutting in Plantations and Natural Stands
Source: Preprints.org preprint supplement (doi:10.20944/preprints201808.0515.v1), 2018-08-30
Supplement: Supplementary file 1 [file supplementary › Table 1.pdf]

Table 1. Site description in 2009

| Origin     | Site            | Age range of<br>dominant tree<br>n=6 | Years after<br>partial cut | Stem<br>removal | BA (m <sup>2</sup> /ha) |     | Mean dbh (cm) |     | Stems/ha |      |
|------------|-----------------|--------------------------------------|----------------------------|-----------------|-------------------------|-----|---------------|-----|----------|------|
|            |                 |                                      |                            | %               | spruce                  | fir | spruce        | fir | spruce   | fir  |
| Natural    | 1               | 37-40                                | 10                         | 14.0            | –                       | 37  | –             | 15  | –        | 1850 |
|            | 2               | 52-65                                | 11                         | 67.7            | 3                       | 26  | 20            | 16  | 75       | 1325 |
|            | 3               | 51-71                                | 10                         | 45.5            | 5                       | 38  | 20            | 16  | 150      | 1800 |
|            | 4               | 46-52                                | 9                          | 38.2            | 4                       | 26  | 18            | 15  | 125      | 1400 |
|            | 5               | 37-52                                | 9                          | 36.9            | 16                      | 15  | 15            | 17  | 700      | 775  |
|            | 6               | 48-60                                | 9                          | 53.0            | 2                       | 25  | 21            | 16  | 75       | 1100 |
|            | 7               | 55-74                                | 10                         | 27.9            | 12                      | 26  | 20            | 19  | 300      | 875  |
|            | 8               | 62-71                                | 9                          | 52.1            | 5                       | 36  | 20            | 14  | 150      | 2000 |
|            | 9               | 60-85                                | 9                          | 11.6            | 7                       | 32  | 19            | 16  | 200      | 1350 |
|            | 10              | 60-77                                | 14                         | 73.5            | 4                       | 26  | 20            | 19  | 75       | 825  |
|            | 11              | 73-104                               | 10                         | 74.0            | 8                       | 26  | 25            | 18  | 150      | 975  |
|            | 12              | 70-75                                | 23                         | 60.4            | 7                       | 33  | 20            | 18  | 200      | 1225 |
| Plantation | 13 <sup>1</sup> | 82                                   | 30-15 <sup>2</sup>         | 42.0            | 30                      | 2   | 23            | 6   | 675      | 150  |
|            | 14              | 57                                   | 16-6 <sup>2</sup>          | 52.6            | 40                      | –   | 22            | –   | 950      | –    |
|            | 15              | 49                                   | 8                          | 44.3            | 34                      | –   | 17            | –   | 1475     | –    |
|            | 16              | 52                                   | 19-8 <sup>2</sup>          | 50.0            | 35                      | –   | 22            | –   | 825      | –    |
|            | 17              | 57                                   | 12                         | 65.6            | 29                      | –   | 24            | –   | 650      | –    |

<sup>1</sup> Four SU were carried out in the same plantation<sup>2</sup> Two partial cuts in plantation; in these cases, only seedlings established after the last partial cut were considered in the analyses.
